# Supplementary material for: Heterogeneity and potential therapeutic insights for triple-negative breast cancer based on metabolic‐associated molecular subtypes and genomic mutations
Source: Frontiers journal article supplement (doi:10.3389/fphar.2023.1224828), 2023-09-01
Supplement: Presentation_1.zip [file Presentation_1.zip]

## Sheet: Description
Human Metabolic Enzymes and Transporters
Gene Name	Official Full Name provided by Human Gene Nomenclature Committee
Gene Symbol	Official Symbol provided by Human Gene Nomenclature Committee
Entrez Gene ID	Gene ID Number provided by Entrez Gene (NCBI)
Classification	Broad class or pathway classification based on known or predicted gene function

## Sheet: All metabolic genes
Table S3. Previously, a total of 2,752 metabolic genes were reported.
Gene Name	Gene Symbol	Entrez Gene ID	Classification
ATP-binding cassette, sub-family A (ABC1), member 1	ABCA1	19	ABC Transporter
ATP-binding cassette, sub-family A (ABC1), member 10	ABCA10	10349	ABC Transporter
ATP-binding cassette, sub-family A (ABC1), member 12	ABCA12	26154	ABC Transporter
ATP-binding cassette, sub-family A (ABC1), member 13	ABCA13	154664	ABC Transporter
ATP-binding cassette, sub-family A (ABC1), member 2	ABCA2	20	ABC Transporter
ATP-binding cassette, sub-family A (ABC1), member 3	ABCA3	21	ABC Transporter
ATP-binding cassette, sub-family A (ABC1), member 4	ABCA4	24	ABC Transporter
ATP-binding cassette, sub-family A (ABC1), member 5	ABCA5	23461	ABC Transporter
ATP-binding cassette, sub-family A (ABC1), member 6	ABCA6	23460	ABC Transporter
ATP-binding cassette, sub-family A (ABC1), member 7	ABCA7	10347	ABC Transporter
ATP-binding cassette, sub-family A (ABC1), member 8	ABCA8	10351	ABC Transporter
ATP-binding cassette, sub-family A (ABC1), member 9	ABCA9	10350	ABC Transporter
ATP-binding cassette, sub-family B (MDR/TAP), member 1	ABCB1	5243	ABC Transporter
ATP-binding cassette, sub-family B (MDR/TAP), member 10	ABCB10	23456	ABC Transporter
ATP-binding cassette, sub-family B (MDR/TAP), member 11	ABCB11	8647	ABC Transporter
ATP-binding cassette, sub-family B (MDR/TAP), member 4	ABCB4	5244	ABC Transporter
ATP-binding cassette, sub-family B (MDR/TAP), member 5	ABCB5	340273	ABC Transporter
ATP-binding cassette, sub-family B (MDR/TAP), member 6	ABCB6	10058	ABC Transporter
ATP-binding cassette, sub-family B (MDR/TAP), member 7	ABCB7	22	ABC Transporter
ATP-binding cassette, sub-family B (MDR/TAP), member 8	ABCB8	11194	ABC Transporter
ATP-binding cassette, sub-family B (MDR/TAP), member 9	ABCB9	23457	ABC Transporter
ATP-binding cassette, sub-family C (CFTR/MRP), member 1	ABCC1	4363	ABC Transporter
ATP-binding cassette, sub-family C (CFTR/MRP), member 10	ABCC10	89845	ABC Transporter
ATP-binding cassette, sub-family C (CFTR/MRP), member 11	ABCC11	85320	ABC Transporter
ATP-binding cassette, sub-family C (CFTR/MRP), member 12	ABCC12	94160	ABC Transporter
ATP-binding cassette, sub-family C (CFTR/MRP), member 13	ABCC13	150000	ABC Transporter
ATP-binding cassette, sub-family C (CFTR/MRP), member 2	ABCC2	1244	ABC Transporter
ATP-binding cassette, sub-family C (CFTR/MRP), member 3	ABCC3	8714	ABC Transporter
ATP-binding cassette, sub-family C (CFTR/MRP), member 4	ABCC4	10257	ABC Transporter
ATP-binding cassette, sub-family C (CFTR/MRP), member 5	ABCC5	10057	ABC Transporter
ATP-binding cassette, sub-family C (CFTR/MRP), member 6	ABCC6	368	ABC Transporter
ATP-binding cassette, sub-family C (CFTR/MRP), member 8	ABCC8	6833	ABC Transporter
ATP-binding cassette, sub-family C (CFTR/MRP), member 9	ABCC9	10060	ABC Transporter
ATP-binding cassette, sub-family D (ALD), member 1	ABCD1	215	ABC Transporter
ATP-binding cassette, sub-family D (ALD), member 2	ABCD2	225	ABC Transporter
ATP-binding cassette, sub-family D (ALD), member 3	ABCD3	5825	ABC Transporter
ATP-binding cassette, sub-family D (ALD), member 4	ABCD4	5826	ABC Transporter
ATP-binding cassette, sub-family E (OABP), member 1	ABCE1	6059	ABC Transporter
ATP-binding cassette, sub-family F (GCN20), member 1	ABCF1	23	ABC Transporter
ATP-binding cassette, sub-family F (GCN20), member 2	ABCF2	10061	ABC Transporter
ATP-binding cassette, sub-family F (GCN20), member 3	ABCF3	55324	ABC Transporter
ATP-binding cassette, sub-family G (WHITE), member 1	ABCG1	9619	ABC Transporter
ATP-binding cassette, sub-family G (WHITE), member 2	ABCG2	9429	ABC Transporter
ATP-binding cassette, sub-family G (WHITE), member 4	ABCG4	64137	ABC Transporter
ATP-binding cassette, sub-family G (WHITE), member 5 (sterolin 1)	ABCG5	64240	ABC Transporter
ATP-binding cassette, sub-family G (WHITE), member 8 (sterolin 2)	ABCG8	64241	ABC Transporter
aminoadipate aminotransferase	AADAT	51166	Amino Acid
Aminoacylase 1	ACY1	95	Amino Acid
Aminoacylase 1-like	ACY1L	96	Amino Acid
aspartoacylase (aminocyclase) 3	ACY3	91703	Amino Acid
arginine decarboxylase	ADC	113451	Amino Acid
acireductone dioxygenase 1	ADI1	55256	Amino Acid
alkylglycerone phosphate synthase	AGPS	8540	Amino Acid
alanine-glyoxylate aminotransferase	AGXT	189	Amino Acid
alanine-glyoxylate aminotransferase 2	AGXT2	64902	Amino Acid
alanine-glyoxylate aminotransferase 2-like 1	AGXT2L1	64850	Amino Acid
alanine-glyoxylate aminotransferase 2-like 2	AGXT2L2	85007	Amino Acid
Asparagine synthetase	ASNS	440	Amino Acid
asparagine synthetase domain containing 1	ASNSD1	54529	Amino Acid
aspartoacylase (Canavan disease)	ASPA	443	Amino Acid
asparaginase homolog (S. cerevisiae)	ASPG	374569	Amino Acid
asparaginase like 1	ASRGL1	80150	Amino Acid
cysteine conjugate-beta lyase; cytoplasmic (glutamine transaminase K, kyneurenine aminotransferase)	CCBL1	883	Amino Acid
cysteine conjugate-beta lyase 2	CCBL2	56267	Amino Acid
crystallin, mu	CRYM	1428	Amino Acid
D-amino-acid oxidase	DAO	1610	Amino Acid
D-aspartate oxidase	DDO	8528	Amino Acid
glycine C-acetyltransferase (2-amino-3-ketobutyrate coenzyme A ligase)	GCAT	23464	Amino Acid
glutaryl-Coenzyme A dehydrogenase	GCDH	2639	Amino Acid
glutamic-pyruvate transaminase (alanine aminotransferase)	GPT	2875	Amino Acid
glutamic pyruvate transaminase (alanine aminotransferase) 2	GPT2	84706	Amino Acid
ilvB (bacterial acetolactate synthase)-like	ILVBL	10994	Amino Acid
lens protein with glutamine synthetase domain	LGSN	51557	Amino Acid
pterin-4 alpha-carbinolamine dehydratase/dimerization cofactor of hepatocyte nuclear factor 1 alpha	PCBD1	5092	Amino Acid
pterin-4 alpha-carbinolamine dehydratase/dimerization cofactor of hepatocyte nuclear factor 1 alpha (TCF1) 2	PCBD2	84105	Amino Acid
saccharopine dehydrogenase (putative)	SCCPDH	51097	Amino Acid
selenocysteine lyase	SCLY	51540	Amino Acid
serine dehydratase	SDS	10993	Amino Acid
serine dehydratase-like	SDSL	113675	Amino Acid
selenophosphate synthetase 1	SEPHS1	22929	Amino Acid
selenophosphate synthetase 2	SEPHS2	22928	Amino Acid
threonine synthase-like 1 (S. cerevisiae)	THNSL1	79896	Amino Acid
threonine synthase-like 2 (S. cerevisiae)	THNSL2	55258	Amino Acid
trimethyllysine hydroxylase, epsilon	TMLHE	55217	Amino Acid
chitinase 3-like 1 (cartilage glycoprotein-39)	CHI3L1	1116	Aminosugar
chitinase 3-like 2	CHI3L2	1117	Aminosugar
chitinase, acidic	CHIA	27159	Aminosugar
chitinase domain containing 1	CHID1	66005	Aminosugar
chitinase 1	CHIT1	1118	Aminosugar
Cytidine monophosphate N-acetylneuraminic acid synthetase	CMAS	55907	Aminosugar
glutamine-fructose-6-phosphate transaminase 1	GFPT1	2673	Aminosugar
glutamine-fructose-6-phosphate transaminase 2	GFPT2	9945	Aminosugar
glucosamine (UDP-N-acetyl)-2-epimerase/N-acetylmannosamine kinase	GNE	10020	Aminosugar
glucosamine-6-phosphate deaminase 1	GNPDA1	10007	Aminosugar
glucosamine-6-phosphate deaminase 2	GNPDA2	132789	Aminosugar
glucosamine-phosphate N-acetyltransferase 1	GNPNAT1	64841	Aminosugar
N-acetylglucosamine-1-phosphate transferase, alpha and beta subunits	GNPTAB	79158	Aminosugar
N-acetylglucosamine-1-phosphate transferase, gamma subunit	GNPTG	84572	Aminosugar
N-acetylglucosamine kinase	NAGK	55577	Aminosugar
N-acetylneuraminic acid phosphatase	NANP	140838	Aminosugar
N-acetylneuraminic acid synthase (sialic acid synthase)	NANS	54187	Aminosugar
N-acetylneuraminate pyruvate lyase (dihydrodipicolinate synthase)	NPL	80896	Aminosugar
phosphoglucomutase 3	PGM3	5238	Aminosugar
renin binding protein	RENBP	5973	Aminosugar
UDP-N-acteylglucosamine pyrophosphorylase 1	UAP1	6675	Aminosugar
UDP-N-acteylglucosamine pyrophosphorylase 1-like 1	UAP1L1	91373	Aminosugar
lactate dehydrogenase A	LDHA	3939	Anaerobic Glycolysis
lactate dehydrogenase A-like 6A	LDHAL6A	160287	Anaerobic Glycolysis
lactate dehydrogenase A-like 6B	LDHAL6B	92483	Anaerobic Glycolysis
lactate dehydrogenase B	LDHB	3945	Anaerobic Glycolysis
lactate dehydrogenase C	LDHC	3948	Anaerobic Glycolysis
lactate dehydrogenase D	LDHD	197257	Anaerobic Glycolysis
ATPase type 13A1	ATP13A1	57130	ATPase
ATPase type 13A2	ATP13A2	23400	ATPase
ATPase type 13A3	ATP13A3	79572	ATPase
ATPase type 13A4	ATP13A4	84239	ATPase
ATPase type 13A5	ATP13A5	344905	ATPase
methylmalonic aciduria (cobalamin deficiency) cblB type	MMAB	326625	B12
methylmalonic aciduria (cobalamin deficiency) cblC type, with homocystinuria	MMACHC	25974	B12
methylmalonic aciduria (cobalamin deficiency) cblD type, with homocystinuria	MMADHC	27249	B12
5-methyltetrahydrofolate-homocysteine methyltransferase reductase	MTRR	4552	B12
branched chain aminotransferase 1, cytosolic	BCAT1	586	BCAAs
branched chain aminotransferase 2, mitochondrial	BCAT2	587	BCAAs
branched chain keto acid dehydrogenase E1, alpha polypeptide	BCKDHA	593	BCAAs
branched chain keto acid dehydrogenase E1, beta polypeptide (maple syrup urine disease)	BCKDHB	594	BCAAs
dihydrolipoamide branched chain transacylase E2	DBT	1629	BCAAs
3-hydroxyisobutyrate dehydrogenase	HIBADH	11112	BCAAs
3-hydroxyisobutyryl-Coenzyme A hydrolase	HIBCH	26275	BCAAs
isovaleryl Coenzyme A dehydrogenase	IVD	3712	BCAAs
methylcrotonoyl-Coenzyme A carboxylase 1 (alpha)	MCCC1	56922	BCAAs
methylcrotonoyl-Coenzyme A carboxylase 2 (beta)	MCCC2	64087	BCAAs
GTP cyclohydrolase 1 (dopa-responsive dystonia)	GCH1	2643	BH4
6-pyruvoyltetrahydropterin synthase	PTS	5805	BH4
quinoid dihydropteridine reductase	QDPR	5860	BH4
sepiapterin reductase (7,8-dihydrobiopterin:NADP+ oxidoreductase)	SPR	6697	BH4
bile acid Coenzyme A: amino acid N-acyltransferase (glycine N-choloyltransferase)	BAAT	570	Bile Acid
cytochrome P450, family 27, subfamily A, polypeptide 1	CYP27A1	1593	Bile Acid
cytochrome P450, family 7, subfamily A, polypeptide 1	CYP7A1	1581	Bile Acid
cytochrome P450, family 7, subfamily B, polypeptide 1	CYP7B1	9420	Bile Acid
cytochrome P450, family 8, subfamily B, polypeptide 1	CYP8B1	1582	Bile Acid
hydroxy-delta-5-steroid dehydrogenase, 3 beta- and steroid delta-isomerase 7	HSD3B7	80270	Bile Acid
fructose-1,6-bisphosphatase 1	FBP1	2203	Carbohydrate Storage
fructose-1,6-bisphosphatase 2	FBP2	8789	Carbohydrate Storage
glucose-6-phosphatase, catalytic subunit	G6PC	2538	Carbohydrate Storage
glucose-6-phosphatase, catalytic, 2	G6PC2	57818	Carbohydrate Storage
glucose 6 phosphatase, catalytic, 3	G6PC3	92579	Carbohydrate Storage
glucan (1,4-alpha-), branching enzyme 1 (glycogen branching enzyme, Andersen disease, glycogen storage disease type IV)	GBE1	2632	Carbohydrate Storage
glycogenin 1	GYG1	2992	Carbohydrate Storage
glycogenin 2	GYG2	8908	Carbohydrate Storage
glycogen synthase 1 (muscle)	GYS1	2997	Carbohydrate Storage
glycogen synthase 2 (liver)	GYS2	2998	Carbohydrate Storage
phosphoenolpyruvate carboxykinase 1 (soluble)	PCK1	5105	Carbohydrate Storage
phosphoenolpyruvate carboxykinase 2 (mitochondrial)	PCK2	5106	Carbohydrate Storage
UDP-glucose pyrophosphorylase 2	UGP2	7360	Carbohydrate Storage
cytochrome P450, family 51, subfamily A, polypeptide 1	CYP51A1	1595	Cholesterol
24-dehydrocholesterol reductase	DHCR24	1718	Cholesterol
7-dehydrocholesterol reductase	DHCR7	1717	Cholesterol
emopamil binding protein (sterol isomerase)	EBP	10682	Cholesterol
emopamil binding protein-like	EBPL	84650	Cholesterol
farnesyl-diphosphate farnesyltransferase 1	FDFT1	2222	Cholesterol
farnesyl diphosphate synthase (farnesyl pyrophosphate synthetase, dimethylallyltranstransferase, geranyltranstransferase)	FDPS	2224	Cholesterol
hydroxysteroid (17-beta) dehydrogenase 7	HSD17B7	51478	Cholesterol
Lamin B receptor	LBR	3930	Cholesterol
lecithin-cholesterol acyltransferase	LCAT	3931	Cholesterol
lanosterol synthase (2,3-oxidosqualene-lanosterol cyclase)	LSS	4047	Cholesterol
NAD(P) dependent steroid dehydrogenase-like	NSDHL	50814	Cholesterol
sterol-C4-methyl oxidase-like	SC4MOL	6307	Cholesterol
sterol-C5-desaturase (ERG3 delta-5-desaturase homolog, S. cerevisiae)-like	SC5DL	6309	Cholesterol
Squalene epoxidase	SQLE	6713	Cholesterol
transmembrane 7 superfamily member 2	TM7SF2	7108	Cholesterol
acetoacetyl-CoA synthetase	AACS	65985	CoA
acyl-CoA thioesterase 1	ACOT1	641371	CoA
acyl-CoA thioesterase 11	ACOT11	26027	CoA
acyl-CoA thioesterase 12	ACOT12	134526	CoA
acyl-CoA thioesterase 2	ACOT2	10965	CoA
acyl-CoA thioesterase 4	ACOT4	122970	CoA
acyl-CoA thioesterase 6	ACOT6	641372	CoA
acyl-CoA thioesterase 7	ACOT7	11332	CoA
Acyl-CoA thioesterase 8	ACOT8	10005	CoA
acyl-CoA thioesterase 9	ACOT9	23597	CoA
Coenzyme A synthase	COASY	80347	CoA
pantothenate kinase 1	PANK1	53354	CoA
pantothenate kinase 2 (Hallervorden-Spatz syndrome)	PANK2	80025	CoA
pantothenate kinase 3	PANK3	79646	CoA
pantothenate kinase 4	PANK4	55229	CoA
phosphopantothenoylcysteine decarboxylase	PPCDC	60490	CoA
phosphopantothenoylcysteine synthetase	PPCS	79717	CoA
S-adenosylhomocysteine hydrolase	AHCY	191	Cofactor
S-adenosylhomocysteine hydrolase-like 1	AHCYL1	10768	Cofactor
S-adenosylhomocysteine hydrolase-like 2	AHCYL2	23382	Cofactor
butyrobetaine (gamma), 2-oxoglutarate dioxygenase (gamma-butyrobetaine hydroxylase) 1	BBOX1	8424	Cofactor
biotinidase	BTD	686	Cofactor
carboxyl ester lipase (bile salt-stimulated lipase)	CEL	1056	Cofactor
carnitine acetyltransferase	CRAT	1384	Cofactor
cubilin (intrinsic factor-cobalamin receptor)	CUBN	8029	Cofactor
cytochrome P450, family 24, subfamily A, polypeptide 1	CYP24A1	1591	Cofactor
cytochrome P450, family 27, subfamily B, polypeptide 1	CYP27B1	1594	Cofactor
dihydroxyacetone kinase 2 homolog (S. cerevisiae)	DAK	26007	Cofactor
FAD1 flavin adenine dinucleotide synthetase homolog (S. cerevisiae)	FLAD1	80308	Cofactor
folate hydrolase (prostate-specific membrane antigen) 1	FOLH1	2346	Cofactor
gephyrin	GPHN	10243	Cofactor
holocarboxylase synthetase (biotin-(proprionyl-Coenzyme A-carboxylase (ATP-hydrolysing)) ligase)	HLCS	3141	Cofactor
molybdenum cofactor sulfurase	MOCOS	55034	Cofactor
molybdenum cofactor synthesis 1	MOCS1	4337	Cofactor
molybdenum cofactor synthesis 2	MOCS2	4338	Cofactor
molybdenum cofactor synthesis 3	MOCS3	27304	Cofactor
N-acetylglutamate synthase	NAGS	162417	Cofactor
riboflavin kinase	RFK	55312	Cofactor
Thiamine triphosphatase	THTPA	79178	Cofactor
thiamin pyrophosphokinase 1	TPK1	27010	Cofactor
vitamin K epoxide reductase complex, subunit 1	VKORC1	79001	Cofactor
vitamin K epoxide reductase complex, subunit 1-like 1	VKORC1L1	154807	Cofactor
michondrially encoded NADH dehydrogenase 1	MT-ND1	4535	Complex I
michondrially encoded NADH dehydrogenase 2	MT-ND2	4536	Complex I
michondrially encoded NADH dehydrogenase 3	MT-ND3	4537	Complex I
michondrially encoded NADH dehydrogenase 4	MT-ND4	4538	Complex I
michondrially encoded NADH dehydrogenase 4 like	MT-ND4L	4539	Complex I
michondrially encoded NADH dehydrogenase 5	MT-ND5	4540	Complex I
michondrially encoded NADH dehydrogenase 6	MT-ND6	4541	Complex I
NADH dehydrogenase (ubiquinone) 1 alpha subcomplex, 1, 7.5kDa	NDUFA1	4694	Complex I
NADH dehydrogenase (ubiquinone) 1 alpha subcomplex, 10, 42kDa	NDUFA10	4705	Complex I
NADH dehydrogenase (ubiquinone) 1 alpha subcomplex, 11, 14.7kDa	NDUFA11	126328	Complex I
NADH dehydrogenase (ubiquinone) 1 alpha subcomplex, 12	NDUFA12	55967	Complex I
NADH dehydrogenase (ubiquinone) 1 alpha subcomplex, 13	NDUFA13	51079	Complex I
NADH dehydrogenase (ubiquinone) 1 alpha subcomplex, 2, 8kDa	NDUFA2	4695	Complex I
NADH dehydrogenase (ubiquinone) 1 alpha subcomplex, 3, 9kDa	NDUFA3	4696	Complex I
NADH dehydrogenase (ubiquinone) 1 alpha subcomplex, 4, 9kDa	NDUFA4	4697	Complex I
NADH dehydrogenase (ubiquinone) 1 alpha subcomplex, 4-like	NDUFA4L	404215	Complex I
NADH dehydrogenase (ubiquinone) 1 alpha subcomplex, 4-like 2	NDUFA4L2	56901	Complex I
NADH dehydrogenase (ubiquinone) 1 alpha subcomplex, 5, 13kDa	NDUFA5	4698	Complex I
NADH dehydrogenase (ubiquinone) 1 alpha subcomplex, 6, 14kDa	NDUFA6	4700	Complex I
NADH dehydrogenase (ubiquinone) 1 alpha subcomplex, 7, 14.5kDa	NDUFA7	4701	Complex I
NADH dehydrogenase (ubiquinone) 1 alpha subcomplex, 8, 19kDa	NDUFA8	4702	Complex I
NADH dehydrogenase (ubiquinone) 1 alpha subcomplex, 9, 39kDa	NDUFA9	4704	Complex I
NADH dehydrogenase (ubiquinone) 1, alpha/beta subcomplex, 1, 8kDa	NDUFAB1	4706	Complex I
NADH dehydrogenase (ubiquinone) 1 alpha subcomplex, assembly factor 1	NDUFAF1	51103	Complex I
NADH dehydrogenase (ubiquinone) 1 alpha subcomplex, assembly factor 2	NDUFAF2	91942	Complex I
NADH dehydrogenase (ubiquinone) 1 beta subcomplex, 1, 7kDa	NDUFB1	4707	Complex I
NADH dehydrogenase (ubiquinone) 1 beta subcomplex, 10, 22kDa	NDUFB10	4716	Complex I
NADH dehydrogenase (ubiquinone) 1 beta subcomplex, 11, 17.3kDa	NDUFB11	54539	Complex I
NADH dehydrogenase (ubiquinone) 1 beta subcomplex, 2, 8kDa	NDUFB2	4708	Complex I
NADH dehydrogenase (ubiquinone) 1 beta subcomplex, 3, 12kDa	NDUFB3	4709	Complex I
NADH dehydrogenase (ubiquinone) 1 beta subcomplex, 4, 12kDa	NDUFB4	4710	Complex I
NADH dehydrogenase (ubiquinone) 1 beta subcomplex, 5, 16kDa	NDUFB5	4711	Complex I
NADH dehydrogenase (ubiquinone) 1 beta subcomplex, 6, 17kDa	NDUFB6	4712	Complex I
NADH dehydrogenase (ubiquinone) 1 beta subcomplex, 7, 18kDa	NDUFB7	4713	Complex I
NADH dehydrogenase (ubiquinone) 1 beta subcomplex, 8, 19kDa	NDUFB8	4714	Complex I
NADH dehydrogenase (ubiquinone) 1 beta subcomplex, 9, 22kDa	NDUFB9	4715	Complex I
NADH dehydrogenase (ubiquinone) 1, subcomplex unknown, 1, 6kDa	NDUFC1	4717	Complex I
NADH dehydrogenase (ubiquinone) 1, subcomplex unknown, 2, 14.5kDa	NDUFC2	4718	Complex I
NADH dehydrogenase (ubiquinone) Fe-S protein 1, 75kDa (NADH-coenzyme Q reductase)	NDUFS1	4719	Complex I
NADH dehydrogenase (ubiquinone) Fe-S protein 2, 49kDa (NADH-coenzyme Q reductase)	NDUFS2	4720	Complex I
NADH dehydrogenase (ubiquinone) Fe-S protein 3, 30kDa (NADH-coenzyme Q reductase)	NDUFS3	4722	Complex I
NADH dehydrogenase (ubiquinone) Fe-S protein 4, 18kDa (NADH-coenzyme Q reductase)	NDUFS4	4724	Complex I
NADH dehydrogenase (ubiquinone) Fe-S protein 5, 15kDa (NADH-coenzyme Q reductase)	NDUFS5	4725	Complex I
NADH dehydrogenase (ubiquinone) Fe-S protein 6, 13kDa (NADH-coenzyme Q reductase)	NDUFS6	4726	Complex I
NADH dehydrogenase (ubiquinone) Fe-S protein 7, 20kDa (NADH-coenzyme Q reductase)	NDUFS7	374291	Complex I
NADH dehydrogenase (ubiquinone) Fe-S protein 8, 23kDa (NADH-coenzyme Q reductase)	NDUFS8	4728	Complex I
NADH dehydrogenase (ubiquinone) flavoprotein 1, 51kDa	NDUFV1	4723	Complex I
NADH dehydrogenase (ubiquinone) flavoprotein 2, 24kDa	NDUFV2	4729	Complex I
NADH dehydrogenase (ubiquinone) flavoprotein 3, 10kDa	NDUFV3	4731	Complex I
succinate dehydrogenase complex, subunit A, flavoprotein (Fp)	SDHA	6389	Complex II
succinate dehydrogenase complex, subunit B, iron sulfur (Ip)	SDHB	6390	Complex II
succinate dehydrogenase complex, subunit C, integral membrane protein, 15kDa	SDHC	6391	Complex II
succinate dehydrogenase complex, subunit D, integral membrane protein	SDHD	6392	Complex II
cytochrome c-1	CYC1	1537	Complex III
cytochrome c, somatic	CYCS	54205	Complex III
Cytochrome b	MT-CYB	4519	Complex III
ubiquinol-cytochrome c reductase complex (7.2 kD)	UCRC	29796	Complex III
ubiquinol-cytochrome c reductase, 6.4kDa subunit	UQCR	10975	Complex III
ubiquinol-cytochrome c reductase binding protein	UQCRB	7381	Complex III
ubiquinol-cytochrome c reductase core protein I	UQCRC1	7384	Complex III
ubiquinol-cytochrome c reductase core protein II	UQCRC2	7385	Complex III
ubiquinol-cytochrome c reductase, Rieske iron-sulfur polypeptide 1	UQCRFS1	7386	Complex III
ubiquinol-cytochrome c reductase hinge protein	UQCRH	7388	Complex III
ubiquinol-cytochrome c reductase, complex III subunit VII, 9.5kDa	UQCRQ	27089	Complex III
mitochondrially encoded cytochrome c oxidase I	COX1	4512	Complex IV
COX10 homolog, cytochrome c oxidase assembly protein, heme A: farnesyltransferase (yeast)	COX10	1352	Complex IV
COX11 homolog, cytochrome c oxidase assembly protein (yeast)	COX11	1353	Complex IV
COX15 homolog, cytochrome c oxidase assembly protein (yeast)	COX15	1355	Complex IV
COX16 cytochrome c oxidase assembly homolog (S. cerevisiae)	COX16	51241	Complex IV
COX17 cytochrome c oxidase assembly homolog (S. cerevisiae)	COX17	10063	Complex IV
COX18 cytochrome c oxidase assembly homolog (S. cerevisiae)	COX18	285521	Complex IV
COX19 cytochrome c oxidase assembly homolog (S. cerevisiae)	COX19	90639	Complex IV
mitochondrially encoded cytochrome c oxidase II	COX2	4513	Complex IV
mitochondrially encoded cytochrome c oxidase III	COX3	4514	Complex IV
cytochrome c oxidase subunit IV isoform 1	COX4I1	1327	Complex IV
cytochrome c oxidase subunit IV isoform 2 (lung)	COX4I2	84701	Complex IV
cytochrome c oxidase subunit Va	COX5A	9377	Complex IV
Cytochrome c oxidase subunit Vb	COX5B	1329	Complex IV
cytochrome c oxidase subunit VIa polypeptide 1	COX6A1	1337	Complex IV
cytochrome c oxidase subunit VIa polypeptide 2	COX6A2	1339	Complex IV
cytochrome c oxidase subunit Vib polypeptide 1 (ubiquitous)	COX6B1	1340	Complex IV
cytochrome c oxidase subunit VIb polypeptide 2 (testis)	COX6B2	125965	Complex IV
cytochrome c oxidase subunit VIc	COX6C	1345	Complex IV
cytochrome c oxidase subunit VIIa polypeptide 1 (muscle)	COX7A1	1346	Complex IV
cytochrome c oxidase subunit VIIa polypeptide 2 (liver)	COX7A2	1347	Complex IV
cytochrome c oxidase subunit VIIa polypeptide 2 like	COX7A2L	9167	Complex IV
cytochrome c oxidase subunit VIIb	COX7B	1349	Complex IV
cytochrome c oxidase subunit VIIb2	COX7B2	170712	Complex IV
cytochrome c oxidase subunit VIIc	COX7C	1350	Complex IV
cytochrome c oxidase subunit 8A (ubiquitous)	COX8A	1351	Complex IV
cytochrome c oxidase subunit 8C	COX8C	341947	Complex IV
creatine kinase, brain	CKB	1152	Creatine
creatine kinase, ectopic expression	CKBE	1156	Creatine
creatine kinase, muscle	CKM	1158	Creatine
creatine kinase, mitochondrial 1A	CKMT1A	1159	Creatine
creatine kinase, mitochondrial 1B	CKMT1B	548596	Creatine
creatine kinase, mitochondrial 2 (sarcomeric)	CKMT2	1160	Creatine
guanidinoacetate N-methyltransferase	GAMT	2593	Creatine
glycine amidinotransferase (L-arginine:glycine amidinotransferase)	GATM	2628	Creatine
2-aminoethanethiol (cysteamine) dioxygenase	ADO	84890	Cysteine
cystathionine-beta-synthase	CBS	875	Cysteine
cysteine dioxygenase, type I	CDO1	1036	Cysteine
cysteine sulfinic acid decarboxylase	CSAD	51380	Cysteine
cystathionase (cystathionine gamma-lyase)	CTH	1491	Cysteine
NFS1 nitrogen fixation 1 homolog (S. cerevisiae)	NFS1	9054	Cysteine
prenylcysteine oxidase 1	PCYOX1	51449	Cysteine
prenylcysteine oxidase 1 like	PCYOX1L	78991	Cysteine
sulfite oxidase	SUOX	6821	Cysteine
arylacetamide deacetylase (esterase)	AADAC	13	Detox
arylacetamide deacetylase-like 1	AADACL1	57552	Detox
arylacetamide deacetylase-like 2	AADACL2	344752	Detox
arylacetamide deacetylase-like 3	AADACL3	126767	Detox
arylacetamide deacetylase-like 4	AADACL4	343066	Detox
aldo-keto reductase family 7-like	AKR7L	246181	Detox
butyrylcholinesterase	BCHE	590	Detox
Catalase	CAT	847	Detox
carboxylesterase 1 (monocyte/macrophage serine esterase 1)	CES1	1066	Detox
carboxylesterase 2 (intestine, liver)	CES2	8824	Detox
carboxylesterase 3 (brain)	CES3	23491	Detox
carboxylesterase 7	CES7	221223	Detox
dihydrodiol dehydrogenase (dimeric)	DHDH	27294	Detox
dipeptidase 1 (renal)	DPEP1	1800	Detox
dipeptidase 2	DPEP2	64174	Detox
dipeptidase 3	DPEP3	64180	Detox
epoxide hydrolase 1, microsomal (xenobiotic)	EPHX1	2052	Detox
epoxide hydrolase 2, cytoplasmic	EPHX2	2053	Detox
flavin containing monooxygenase 1	FMO1	2326	Detox
flavin containing monooxygenase 2	FMO2	2327	Detox
flavin containing monooxygenase 3	FMO3	2328	Detox
flavin containing monooxygenase 4	FMO4	2329	Detox
flavin containing monooxygenase 5	FMO5	2330	Detox
superoxide dismutase 1, soluble (amyotrophic lateral sclerosis 1 (adult))	SOD1	6647	Detox
Superoxide dismutase 2, mitochondrial	SOD2	6648	Detox
superoxide dismutase 3, extracellular	SOD3	6649	Detox
thiopurine S-methyltransferase	TPMT	7172	Detox
UDP glucuronosyltransferase 1 family, polypeptide A1	UGT1A1	54658	Detox
UDP glucuronosyltransferase 1 family, polypeptide A10	UGT1A10	54575	Detox
UDP glucuronosyltransferase 1 family, polypeptide A3	UGT1A3	54659	Detox
UDP glucuronosyltransferase 1 family, polypeptide A4	UGT1A4	54657	Detox
UDP glucuronosyltransferase 1 family, polypeptide A5	UGT1A5	54579	Detox
UDP glucuronosyltransferase 1 family, polypeptide A6	UGT1A6	54578	Detox
UDP glucuronosyltransferase 1 family, polypeptide A7	UGT1A7	54577	Detox
UDP glucuronosyltransferase 1 family, polypeptide A8	UGT1A8	54576	Detox
UDP glucuronosyltransferase 1 family, polypeptide A9	UGT1A9	54600	Detox
UDP glucuronosyltransferase 2 family, polypeptide A1	UGT2A1	10941	Detox
UDP glucuronosyltransferase 2 family, polypeptide A2	UGT2A2	574537	Detox
UDP glucuronosyltransferase 2 family, polypeptide A3	UGT2A3	79799	Detox
UDP glucuronosyltransferase 2 family, polypeptide B10	UGT2B10	7365	Detox
UDP glucuronosyltransferase 2 family, polypeptide B11	UGT2B11	10720	Detox
UDP glucuronosyltransferase 2 family, polypeptide B15	UGT2B15	7366	Detox
UDP glucuronosyltransferase 2 family, polypeptide B17	UGT2B17	7367	Detox
UDP glucuronosyltransferase 2 family, polypeptide B28	UGT2B28	54490	Detox
UDP glucuronosyltransferase 2 family, polypeptide B4	UGT2B4	7363	Detox
UDP glucuronosyltransferase 2 family, polypeptide B7	UGT2B7	7364	Detox
UDP glycosyltransferase 3 family, polypeptide A1	UGT3A1	133688	Detox
UDP glycosyltransferase 3 family, polypeptide A2	UGT3A2	167127	Detox
acetyl-Coenzyme A acyltransferase 1 (peroxisomal 3-oxoacyl-Coenzyme A thiolase)	ACAA1	30	Fatty Acid
acetyl-Coenzyme A acyltransferase 2 (mitochondrial 3-oxoacyl-Coenzyme A thiolase)	ACAA2	10449	Fatty Acid
acetyl-Coenzyme A carboxylase alpha	ACACA	31	Fatty Acid
acetyl-Coenzyme A carboxylase beta	ACACB	32	Fatty Acid
acyl-Coenzyme A dehydrogenase family, member 10	ACAD10	80724	Fatty Acid
acyl-Coenzyme A dehydrogenase family, member 11	ACAD11	84129	Fatty Acid
acyl-Coenzyme A dehydrogenase family, member 8	ACAD8	27034	Fatty Acid
acyl-Coenzyme A dehydrogenase family, member 9	ACAD9	28976	Fatty Acid
acyl-Coenzyme A dehydrogenase, long chain	ACADL	33	Fatty Acid
acyl-Coenzyme A dehydrogenase, C-4 to C-12 straight chain	ACADM	34	Fatty Acid
acyl-Coenzyme A dehydrogenase, C-2 to C-3 short chain	ACADS	35	Fatty Acid
acyl-Coenzyme A dehydrogenase, short/branched chain	ACADSB	36	Fatty Acid
acyl-Coenzyme A dehydrogenase, very long chain	ACADVL	37	Fatty Acid
acetyl-Coenzyme A acetyltransferase 1 (acetoacetyl Coenzyme A thiolase)	ACAT1	38	Fatty Acid
acetyl-Coenzyme A acetyltransferase 2 (acetoacetyl Coenzyme A thiolase)	ACAT2	39	Fatty Acid
acyl-Coenzyme A binding domain containing 3	ACBD3	64746	Fatty Acid
acyl-Coenzyme A binding domain containing 4	ACBD4	79777	Fatty Acid
acyl-Coenzyme A binding domain containing 5	ACBD5	91452	Fatty Acid
acyl-Coenzyme A binding domain containing 6	ACBD6	84320	Fatty Acid
acyl-Coenzyme A binding domain containing 7	ACBD7	414149	Fatty Acid
acyl-Coenzyme A oxidase 1, palmitoyl	ACOX1	51	Fatty Acid
acyl-Coenzyme A oxidase 2, branched chain	ACOX2	8309	Fatty Acid
acyl-Coenzyme A oxidase 3, pristanoyl	ACOX3	8310	Fatty Acid
acyl-Coenzyme A oxidase-like	ACOXL	55289	Fatty Acid
acyl-CoA synthetase bubblegum family member 1	ACSBG1	23205	Fatty Acid
acyl-CoA synthetase bubblegum family member 2	ACSBG2	81616	Fatty Acid
acyl-CoA synthetase family member 2	ACSF2	80221	Fatty Acid
acyl-CoA synthetase family member 3	ACSF3	197322	Fatty Acid
acyl-CoA synthetase long-chain family member 1	ACSL1	2180	Fatty Acid
acyl-CoA synthetase long-chain family member 3	ACSL3	2181	Fatty Acid
Acyl-CoA synthetase long-chain family member 4	ACSL4	2182	Fatty Acid
acyl-CoA synthetase long-chain family member 5	ACSL5	51703	Fatty Acid
acyl-CoA synthetase long-chain family member 6	ACSL6	23305	Fatty Acid
acyl-CoA synthetase medium-chain family member 1	ACSM1	116285	Fatty Acid
acyl-CoA synthetase medium-chain family member 2A	ACSM2A	123876	Fatty Acid
acyl-CoA synthetase medium-chain family member 2B	ACSM2B	348158	Fatty Acid
acyl-CoA synthetase medium-chain family member 3	ACSM3	6296	Fatty Acid
acyl-CoA synthetase medium-chain family member 4	ACSM4	341392	Fatty Acid
acyl-CoA synthetase medium-chain family member 5	ACSM5	54988	Fatty Acid
Acyl-CoA synthetase short-chain family member 1	ACSS1	84532	Fatty Acid
acyl-CoA synthetase short-chain family member 2	ACSS2	55902	Fatty Acid
acyl-CoA synthetase short-chain family member 3	ACSS3	79611	Fatty Acid
citrate lyase beta like	CLYBL	171425	Fatty Acid
carnitine palmitoyltransferase 1A (liver)	CPT1A	1374	Fatty Acid
carnitine palmitoyltransferase 1B (muscle)	CPT1B	1375	Fatty Acid
carnitine palmitoyltransferase 1C	CPT1C	126129	Fatty Acid
carnitine palmitoyltransferase II	CPT2	1376	Fatty Acid
cytochrome P450, family 4, subfamily A, polypeptide 11	CYP4A11	1579	Fatty Acid
cytochrome P450, family 4, subfamily A, polypeptide 22	CYP4A22	284541	Fatty Acid
cytochrome P450, family 4, subfamily B, polypeptide 1	CYP4B1	1580	Fatty Acid
cytochrome P450, family 4, subfamily F, polypeptide 11	CYP4F11	57834	Fatty Acid
cytochrome P450, family 4, subfamily F, polypeptide 12	CYP4F12	66002	Fatty Acid
cytochrome P450, family 4, subfamily F, polypeptide 2	CYP4F2	8529	Fatty Acid
cytochrome P450, family 4, subfamily F, polypeptide 22	CYP4F22	126410	Fatty Acid
cytochrome P450, family 4, subfamily F, polypeptide 3	CYP4F3	4051	Fatty Acid
cytochrome P450, family 4, subfamily F, polypeptide 8	CYP4F8	11283	Fatty Acid
cytochrome P450, family 4, subfamily V, polypeptide 2	CYP4V2	285440	Fatty Acid
cytochrome P450, family 4, subfamily X, polypeptide 1	CYP4X1	260293	Fatty Acid
cytochrome P450, family 4, subfamily Z, polypeptide 1	CYP4Z1	199974	Fatty Acid
dodecenoyl-Coenzyme A delta isomerase (3,2 trans-enoyl-Coenzyme A isomerase)	DCI	1632	Fatty Acid
2,4-dienoyl CoA reductase 1, mitochondrial	DECR1	1666	Fatty Acid
2,4-dienoyl CoA reductase 2, peroxisomal	DECR2	26063	Fatty Acid
diacylglycerol O-acyltransferase homolog 1 (mouse)	DGAT1	8694	Fatty Acid
diacylglycerol O-acyltransferase homolog 2 (mouse)	DGAT2	84649	Fatty Acid
diacylglycerol O-acyltransferase 2-like 3	DGAT2L3	158833	Fatty Acid
diacylglycerol O-acyltransferase 2-like 4	DGAT2L4	158835	Fatty Acid
diacylglycerol O-acyltransferase 2-like 6	DGAT2L6	347516	Fatty Acid
diacylglycerol O-acyltransferase 2-like 7	DGAT2L7	646409	Fatty Acid
enoyl Coenzyme A hydratase 1, peroxisomal	ECH1	1891	Fatty Acid
enoyl Coenzyme A hydratase domain containing 1	ECHDC1	55862	Fatty Acid
enoyl Coenzyme A hydratase domain containing 2	ECHDC2	55268	Fatty Acid
enoyl Coenzyme A hydratase domain containing 3	ECHDC3	79746	Fatty Acid
enoyl Coenzyme A hydratase, short chain, 1, mitochondrial	ECHS1	1892	Fatty Acid
enoyl-Coenzyme A, hydratase/3-hydroxyacyl Coenzyme A dehydrogenase	EHHADH	1962	Fatty Acid
elongation of very long chain fatty acids (FEN1/Elo2, SUR4/Elo3, yeast)-like 1	ELOVL1	64834	Fatty Acid
elongation of very long chain fatty acids (FEN1/Elo2, SUR4/Elo3, yeast)-like 2	ELOVL2	54898	Fatty Acid
elongation of very long chain fatty acids (FEN1/Elo2, SUR4/Elo3, yeast)-like 3	ELOVL3	83401	Fatty Acid
elongation of very long chain fatty acids (FEN1/Elo2, SUR4/Elo3, yeast)-like 4	ELOVL4	6785	Fatty Acid
ELOVL family member 5, elongation of long chain fatty acids (FEN1/Elo2, SUR4/Elo3-like, yeast)	ELOVL5	60481	Fatty Acid
ELOVL family member 6, elongation of long chain fatty acids (FEN1/Elo2, SUR4/Elo3-like, yeast)	ELOVL6	79071	Fatty Acid
ELOVL family member 7, elongation of long chain fatty acids (yeast)	ELOVL7	79993	Fatty Acid
electron-transfer-flavoprotein, alpha polypeptide (glutaric aciduria II)	ETFA	2108	Fatty Acid
electron-transfer-flavoprotein, beta polypeptide	ETFB	2109	Fatty Acid
electron-transferring-flavoprotein dehydrogenase	ETFDH	2110	Fatty Acid
fatty acid 2-hydroxylase	FA2H	79152	Fatty Acid
fatty acid amide hydrolase	FAAH	2166	Fatty Acid
fatty acid amide hydrolase 2	FAAH2	158584	Fatty Acid
fatty acid desaturase 1	FADS1	3992	Fatty Acid
fatty acid desaturase 2	FADS2	9415	Fatty Acid
fatty acid desaturase 3	FADS3	3995	Fatty Acid
fatty acyl CoA reductase 1	FAR1	84188	Fatty Acid
fatty acyl CoA reductase 2	FAR2	55711	Fatty Acid
fatty acid synthase	FASN	2194	Fatty Acid
glycoprotein, synaptic 2	GPSN2	9524	Fatty Acid
2-hydroxyacyl-CoA lyase 1	HACL1	26061	Fatty Acid
hydroxyacyl-Coenzyme A dehydrogenase	HADH	3033	Fatty Acid
hydroxyacyl-Coenzyme A dehydrogenase/3-ketoacyl-Coenzyme A thiolase/enoyl-Coenzyme A hydratase (trifunctional protein), alpha subunit	HADHA	3030	Fatty Acid
hydroxyacyl-Coenzyme A dehydrogenase/3-ketoacyl-Coenzyme A thiolase/enoyl-Coenzyme A hydratase (trifunctional protein), beta subunit	HADHB	3032	Fatty Acid
lipase, hepatic	LIPC	3990	Fatty Acid
lipase, gastric	LIPF	8513	Fatty Acid
lipase, endothelial	LIPG	9388	Fatty Acid
lipase, member H	LIPH	200879	Fatty Acid
lipase, member I	LIPI	149998	Fatty Acid
lipase, family member J	LIPJ	142910	Fatty Acid
lipase, mamber K	LIPK	643414	Fatty Acid
lipase, member M	LIPM	340654	Fatty Acid
lipase, member N	LIPN	643418	Fatty Acid
lipoprotein lipase	LPL	4023	Fatty Acid
lipid phosphate phosphatase-related protein type 2	LPPR2	64748	Fatty Acid
malonyl CoA:ACP acyltransferase (mitochondrial)	MCAT	27349	Fatty Acid
mitochondrial trans-2-enoyl-CoA reductase	MECR	51102	Fatty Acid
monoglyceride lipase	MGLL	11343	Fatty Acid
malonyl-CoA decarboxylase	MLYCD	23417	Fatty Acid
microsomal triglyceride transfer protein	MTTP	4547	Fatty Acid
oleoyl-ACP hydrolase	OLAH	55301	Fatty Acid
3-oxoacyl-ACP synthase, mitochondrial	OXSM	54995	Fatty Acid
peroxisomal D3,D2-enoyl-CoA isomerase	PECI	10455	Fatty Acid
peroxisomal trans-2-enoyl-CoA reductase	PECR	55825	Fatty Acid
phytanoyl-CoA 2-hydroxylase	PHYH	5264	Fatty Acid
phytanoyl-CoA dioxygenase domain containing 1	PHYHD1	254295	Fatty Acid
pancreatic lipase	PNLIP	5406	Fatty Acid
pancreatic lipase-related protein 1	PNLIPRP1	5407	Fatty Acid
pancreatic lipase-related protein 2	PNLIPRP2	5408	Fatty Acid
pancreatic lipase-related protein 3	PNLIPRP3	119548	Fatty Acid
patatin-like phospholipase domain containing 1	PNPLA1	285848	Fatty Acid
patatin-like phospholipase domain containing 2	PNPLA2	57104	Fatty Acid
patatin-like phospholipase domain containing 3	PNPLA3	80339	Fatty Acid
patatin-like phospholipase domain containing 4	PNPLA4	8228	Fatty Acid
patatin-like phospholipase domain containing 5	PNPLA5	150379	Fatty Acid
patatin-like phospholipase domain containing 6	PNPLA6	10908	Fatty Acid
patatin-like phospholipase domain containing 7	PNPLA7	375775	Fatty Acid
patatin-like phospholipase domain containing 8	PNPLA8	50640	Fatty Acid
stearoyl-CoA desaturase (delta-9-desaturase)	SCD	6319	Fatty Acid
stearoyl-CoA desaturase 5	SCD5	79966	Fatty Acid
sterol carrier protein 2	SCP2	6342	Fatty Acid
short chain dehydrogenase/reductase family 16C, member 6	SDR16C6	442388	Fatty Acid
short chain dehydrogenase/reductase family 39U, member 1	SDR39U1	56948	Fatty Acid
short chain dehydrogenase/reductase family 42E, member 1	SDR42E1	93517	Fatty Acid
short chain dehydrogenase/reductase family 9C, member 7	SDR9C7	121214	Fatty Acid
dihydrofolate reductase	DHFR	1719	Folate
dihydrofolate reductase-like 1	DHFRL1	200895	Folate
folylpolyglutamate synthase	FPGS	2356	Folate
methylenetetrahydrofolate dehydrogenase (NADP+ dependent) 1, methenyltetrahydrofolate cyclohydrolase, formyltetrahydrofolate synthetase	MTHFD1	4522	Folate
Methylenetetrahydrofolate dehydrogenase (NADP+ dependent) 1-like	MTHFD1L	25902	Folate
methylenetetrahydrofolate dehydrogenase (NADP+ dependent) 2, methenyltetrahydrofolate cyclohydrolase	MTHFD2	10797	Folate
methylenetetrahydrofolate dehydrogenase (NADP+ dependent) 2-like	MTHFD2L	441024	Folate
5,10-methylenetetrahydrofolate reductase (NADPH)	MTHFR	4524	Folate
5,10-methenyltetrahydrofolate synthetase (5-formyltetrahydrofolate cyclo-ligase)	MTHFS	10588	Folate
methenyltetrahydrofolate synthetase domain containing	MTHFSD	64779	Folate
serine hydroxymethyltransferase 1 (soluble)	SHMT1	6470	Folate
serine hydroxymethyltransferase 2 (mitochondrial)	SHMT2	6472	Folate
aldehyde dehydrogenase 18 family, member A1	ALDH18A1	5832	Glutamate
aldehyde dehydrogenase 5 family, member A1 (succinate-semialdehyde dehydrogenase)	ALDH5A1	7915	Glutamate
glutamate decarboxylase 1 (brain, 67kDa)	GAD1	2571	Glutamate
Glutamate decarboxylase 2 (pancreatic islets and brain, 65kDa)	GAD2	2572	Glutamate
glutamate decarboxylase-like 1	GADL1	339896	Glutamate
glutaminase	GLS	2744	Glutamate
glutaminase 2 (liver, mitochondrial)	GLS2	27165	Glutamate
glutamate dehydrogenase 1	GLUD1	2746	Glutamate
glutamate dehydrogenase 2	GLUD2	2747	Glutamate
glutamate-ammonia ligase (glutamine synthetase)	GLUL	2752	Glutamate
ornithine aminotransferase (gyrate atrophy)	OAT	4942	Glutamate
glutamate-cysteine ligase, catalytic subunit	GCLC	2729	Glutathione
glutamate-cysteine ligase, modifier subunit	GCLM	2730	Glutathione
glutathione peroxidase 1	GPX1	2876	Glutathione
glutathione peroxidase 2 (gastrointestinal)	GPX2	2877	Glutathione
glutathione peroxidase 3 (plasma)	GPX3	2878	Glutathione
glutathione peroxidase 4 (phospholipid hydroperoxidase)	GPX4	2879	Glutathione
glutathione peroxidase 5 (epididymal androgen-related protein)	GPX5	2880	Glutathione
glutathione peroxidase 6 (olfactory)	GPX6	257202	Glutathione
glutathione peroxidase 7	GPX7	2882	Glutathione
glutathione peroxidase 8 (putative)	GPX8	493869	Glutathione
glutathione reductase	GSR	2936	Glutathione
glutathione synthetase	GSS	2937	Glutathione
glutathione S-transferase A1	GSTA1	2938	Glutathione
glutathione S-transferase A2	GSTA2	2939	Glutathione
glutathione S-transferase A3	GSTA3	2940	Glutathione
glutathione S-transferase A4	GSTA4	2941	Glutathione
glutathione S-transferase A5	GSTA5	221357	Glutathione
glutathione S-transferase, C-terminal domain containing	GSTCD	79807	Glutathione
glutathione S-transferase kappa 1	GSTK1	373156	Glutathione
glutathione S-transferase M1	GSTM1	2944	Glutathione
glutathione S-transferase M2 (muscle)	GSTM2	2946	Glutathione
glutathione S-transferase M3 (brain)	GSTM3	2947	Glutathione
glutathione S-transferase M4	GSTM4	2948	Glutathione
glutathione S-transferase M5	GSTM5	2949	Glutathione
glutathione S-transferase omega 1	GSTO1	9446	Glutathione
glutathione S-transferase omega 2	GSTO2	119391	Glutathione
glutathione S-transferase pi	GSTP1	2950	Glutathione
glutathione S-transferase theta 1	GSTT1	2952	Glutathione
glutathione S-transferase theta 2	GSTT2	2953	Glutathione
hydroxyacylglutathione hydrolase	HAGH	3029	Glutathione
hydroxyacylglutathione hydrolase-like	HAGHL	84264	Glutathione
microsomal glutathione S-transferase 1	MGST1	4257	Glutathione
microsomal glutathione S-transferase 2	MGST2	4258	Glutathione
microsomal glutathione S-transferase 3	MGST3	4259	Glutathione
alpha 1,4-galactosyltransferase (globotriaosylceramide synthase)	A4GALT	53947	Glycan
alpha-1,4-N-acetylglucosaminyltransferase	A4GNT	51146	Glycan
ABO blood group (transferase A, alpha 1-3-N-acetylgalactosaminyltransferase; transferase B, alpha 1-3-galactosyltransferase)	ABO	28	Glycan
asparagine-linked glycosylation 1 homolog (S. cerevisiae, beta-1,4-mannosyltransferase)	ALG1	56052	Glycan
asparagine-linked glycosylation 10 homolog (yeast, alpha-1,2-glucosyltransferase)	ALG10	84920	Glycan
asparagine-linked glycosylation 10 homolog B (yeast, alpha-1,2-glucosyltransferase)	ALG10B	144245	Glycan
asparagine-linked glycosylation 11 homolog	ALG11	440138	Glycan
asparagine-linked glycosylation 12 homolog (S. cerevisiae, alpha-1,6-mannosyltransferase)	ALG12	79087	Glycan
asparagine-linked glycosylation 13 homolog (S. cerevisiae)	ALG13	55849	Glycan
asparagine-linked glycosylation 14 homolog (S. cerevisiae)	ALG14	199857	Glycan
asparagine-linked glycosylation 2 homolog (S. cerevisiae, alpha-1,3-mannosyltransferase)	ALG2	85365	Glycan
asparagine-linked glycosylation 3 homolog (S. cerevisiae, alpha-1,3-mannosyltransferase)	ALG3	10195	Glycan
Asparagine-linked glycosylation 5 homolog (S. cerevisiae, dolichyl-phosphate beta-glucosyltransferase)	ALG5	29880	Glycan
asparagine-linked glycosylation 6 homolog (S. cerevisiae, alpha-1,3-glucosyltransferase)	ALG6	29929	Glycan
asparagine-linked glycosylation 8 homolog (S. cerevisiae, alpha-1,3-glucosyltransferase)	ALG8	79053	Glycan
asparagine-linked glycosylation 9 homolog (S. cerevisiae, alpha- 1,2-mannosyltransferase)	ALG9	79796	Glycan
beta-1,3-N-acetylgalactosaminyltransferase 1 (globoside blood group)	B3GALNT1	8706	Glycan
beta-1,3-N-acetylgalactosaminyltransferase 2	B3GALNT2	148789	Glycan
UDP-Gal:betaGlcNAc beta 1,3-galactosyltransferase, polypeptide 1	B3GALT1	8708	Glycan
UDP-Gal:betaGlcNAc beta 1,3-galactosyltransferase, polypeptide 2	B3GALT2	8707	Glycan
UDP-Gal:betaGlcNAc beta 1,3-galactosyltransferase, polypeptide 4	B3GALT4	8705	Glycan
UDP-Gal:betaGlcNAc beta 1,3-galactosyltransferase, polypeptide 5	B3GALT5	10317	Glycan
UDP-Gal:betaGal beta 1,3-galactosyltransferase polypeptide 6	B3GALT6	126792	Glycan
beta 1,3-galactosyltransferase-like	B3GALTL	145173	Glycan
beta-1,3-glucuronyltransferase 1 (glucuronosyltransferase P)	B3GAT1	27087	Glycan
beta-1,3-glucuronyltransferase 2 (glucuronosyltransferase P)	B3GAT2	135152	Glycan
beta-1,3-glucuronyltransferase 3 (glucuronosyltransferase I)	B3GAT3	26229	Glycan
UDP-GlcNAc:betaGal beta-1,3-N-acetylglucosaminyltransferase 1	B3GNT1	11041	Glycan
UDP-GlcNAc:betaGal beta-1,3-N-acetylglucosaminyltransferase 2	B3GNT2	10678	Glycan
UDP-GlcNAc:betaGal beta-1,3-N-acetylglucosaminyltransferase 3	B3GNT3	10331	Glycan
UDP-GlcNAc:betaGal beta-1,3-N-acetylglucosaminyltransferase 4	B3GNT4	79369	Glycan
UDP-GlcNAc:betaGal beta-1,3-N-acetylglucosaminyltransferase 5	B3GNT5	84002	Glycan
UDP-GlcNAc:betaGal beta-1,3-N-acetylglucosaminyltransferase 6 (core 3 synthase)	B3GNT6	192134	Glycan
UDP-GlcNAc:betaGal beta-1,3-N-acetylglucosaminyltransferase 7	B3GNT7	93010	Glycan
UDP-GlcNAc:betaGal beta-1,3-N-acetylglucosaminyltransferase 8	B3GNT8	374907	Glycan
UDP-GlcNAc:betaGal beta-1,3-N-acetylglucosaminyltransferase 9	B3GNT9	84752	Glycan
UDP-GlcNAc:betaGal beta-1,3-N-acetylglucosaminyltransferase-like 1	B3GNTL1	146712	Glycan
beta-1,4-N-acetyl-galactosaminyl transferase 1	B4GALNT1	2583	Glycan
beta-1,4-N-acetyl-galactosaminyl transferase 2	B4GALNT2	124872	Glycan
beta-1,4-N-acetyl-galactosaminyl transferase 3	B4GALNT3	283358	Glycan
beta-1,4-N-acetyl-galactosaminyl transferase 4	B4GALNT4	338707	Glycan
UDP-Gal:betaGlcNAc beta 1,4- galactosyltransferase, polypeptide 1	B4GALT1	2683	Glycan
UDP-Gal:betaGlcNAc beta 1,4- galactosyltransferase, polypeptide 2	B4GALT2	8704	Glycan
UDP-Gal:betaGlcNAc beta 1,4- galactosyltransferase, polypeptide 3	B4GALT3	8703	Glycan
UDP-Gal:betaGlcNAc beta 1,4- galactosyltransferase, polypeptide 4	B4GALT4	8702	Glycan
UDP-Gal:betaGlcNAc beta 1,4- galactosyltransferase, polypeptide 5	B4GALT5	9334	Glycan
UDP-Gal:betaGlcNAc beta 1,4- galactosyltransferase, polypeptide 6	B4GALT6	9331	Glycan
xylosylprotein beta 1,4-galactosyltransferase, polypeptide 7 (galactosyltransferase I)	B4GALT7	11285	Glycan
core 1 synthase, glycoprotein-N-acetylgalactosamine 3-beta-galactosyltransferase, 1	C1GALT1	56913	Glycan
chitobiase, di-N-acetyl-	CTBS	1486	Glycan
defender against cell death	DAD1	1603	Glycan
dolichyl-diphosphooligosaccharide-protein glycosyltransferase	DDOST	1650	Glycan
dehydrodolichyl diphosphate synthase	DHDDS	79947	Glycan
dolichol kinase	DOLK	22845	Glycan
dolichyl pyrophosphate phosphatase 1	DOLPP1	57171	Glycan
dolichyl-phosphate (UDP-N-acetylglucosamine) N-acetylglucosaminephosphotransferase 1 (GlcNAc-1-P transferase)	DPAGT1	1798	Glycan
fructosamine 3 kinase	FN3K	64122	Glycan
fructosamine-3-kinase-related protein	FN3KRP	79672	Glycan
fucosyltransferase 1 (galactoside 2-alpha-L-fucosyltransferase, H blood group)	FUT1	2523	Glycan
fucosyltransferase 10 (alpha (1,3) fucosyltransferase)	FUT10	84750	Glycan
fucosyltransferase 11 (alpha (1,3) fucosyltransferase)	FUT11	170384	Glycan
fucosyltransferase 2 (secretor status included)	FUT2	2524	Glycan
fucosyltransferase 3 (galactoside 3(4)-L-fucosyltransferase, Lewis blood group)	FUT3	2525	Glycan
fucosyltransferase 4 (alpha (1,3) fucosyltransferase, myeloid-specific)	FUT4	2526	Glycan
fucosyltransferase 5 (alpha (1,3) fucosyltransferase)	FUT5	2527	Glycan
Fucosyltransferase 6 (alpha (1,3) fucosyltransferase)	FUT6	2528	Glycan
fucosyltransferase 7 (alpha (1,3) fucosyltransferase)	FUT7	2529	Glycan
fucosyltransferase 8 (alpha (1,6) fucosyltransferase)	FUT8	2530	Glycan
fucosyltransferase 9 (alpha (1,3) fucosyltransferase)	FUT9	10690	Glycan
UDP-galactose-4-epimerase	GALE	2582	Glycan
UDP-N-acetyl-alpha-D-galactosamine:polypeptide N-acetylgalactosaminyltransferase 1 (GalNAc-T1)	GALNT1	2589	Glycan
UDP-N-acetyl-alpha-D-galactosamine:polypeptide N-acetylgalactosaminyltransferase 10 (GalNAc-T10)	GALNT10	55568	Glycan
UDP-N-acetyl-alpha-D-galactosamine:polypeptide N-acetylgalactosaminyltransferase 11 (GalNAc-T11)	GALNT11	63917	Glycan
UDP-N-acetyl-alpha-D-galactosamine:polypeptide N-acetylgalactosaminyltransferase 12 (GalNAc-T12)	GALNT12	79695	Glycan
UDP-N-acetyl-alpha-D-galactosamine:polypeptide N-acetylgalactosaminyltransferase 13 (GalNAc-T13)	GALNT13	114805	Glycan
UDP-N-acetyl-alpha-D-galactosamine:polypeptide N-acetylgalactosaminyltransferase 14 (GalNAc-T14)	GALNT14	79623	Glycan
UDP-N-acetyl-alpha-D-galactosamine:polypeptide N-acetylgalactosaminyltransferase 2 (GalNAc-T2)	GALNT2	2590	Glycan
UDP-N-acetyl-alpha-D-galactosamine:polypeptide N-acetylgalactosaminyltransferase 3 (GalNAc-T3)	GALNT3	2591	Glycan
UDP-N-acetyl-alpha-D-galactosamine:polypeptide N-acetylgalactosaminyltransferase 4 (GalNAc-T4)	GALNT4	8693	Glycan
UDP-N-acetyl-alpha-D-galactosamine:polypeptide N-acetylgalactosaminyltransferase 5 (GalNAc-T5)	GALNT5	11227	Glycan
UDP-N-acetyl-alpha-D-galactosamine:polypeptide N-acetylgalactosaminyltransferase 6 (GalNAc-T6)	GALNT6	11226	Glycan
UDP-N-acetyl-alpha-D-galactosamine:polypeptide N-acetylgalactosaminyltransferase 7 (GalNAc-T7)	GALNT7	51809	Glycan
UDP-N-acetyl-alpha-D-galactosamine:polypeptide N-acetylgalactosaminyltransferase 8 (GalNAc-T8)	GALNT8	26290	Glycan
UDP-N-acetyl-alpha-D-galactosamine:polypeptide N-acetylgalactosaminyltransferase 9 (GalNAc-T9)	GALNT9	50614	Glycan
UDP-N-acetyl-alpha-D-galactosamine:polypeptide N-acetylgalactosaminyltransferase-like 1	GALNTL1	57452	Glycan
UDP-N-acetyl-alpha-D-galactosamine:polypeptide N-acetylgalactosaminyltransferase-like 2	GALNTL2	117248	Glycan
UDP-N-acetyl-alpha-D-galactosamine:polypeptide N-acetylgalactosaminyltransferase-like 4	GALNTL4	374378	Glycan
UDP-N-acetyl-alpha-D-galactosamine:polypeptide N-acetylgalactosaminyltransferase-like 5	GALNTL5	168391	Glycan
UDP-N-acetyl-alpha-D-galactosamine:polypeptide N-acetylgalactosaminyltransferase-like 6	GALNTL6	442117	Glycan
glucosidase, alpha; neutral AB	GANAB	23193	Glycan
glucosidase, alpha; neutral C	GANC	2595	Glycan
glucosidase, beta; acid (includes glucosylceramidase)	GBA	2629	Glycan
glucosidase, beta (bile acid) 2	GBA2	57704	Glycan
glucosidase, beta, acid 3 (cytosolic)	GBA3	57733	Glycan
globoside alpha-1,3-N-acetylgalactosaminyltransferase 1	GBGT1	26301	Glycan
glucosaminyl (N-acetyl) transferase 1, core 2 (beta-1,6-N-acetylglucosaminyltransferase)	GCNT1	2650	Glycan
glucosaminyl (N-acetyl) transferase 2, I-branching enzyme (I blood group)	GCNT2	2651	Glycan
glucosaminyl (N-acetyl) transferase 3, mucin type	GCNT3	9245	Glycan
glucosaminyl (N-acetyl) transferase 4, core 2 (beta-1,6-N-acetylglucosaminyltransferase)	GCNT4	51301	Glycan
glucosaminyl (N-acetyl) transferase family member 6	GCNT6	644378	Glycan
glucosaminyl (N-acetyl) transferase family member 7	GCNT7	140687	Glycan
glucosidase I	GCS1	7841	Glycan
glycosyltransferase 1 domain containing 1	GLT1D1	144423	Glycan
glycosyltransferase 25 domain containing 1	GLT25D1	79709	Glycan
glycosyltransferase 25 domain containing 2	GLT25D2	23127	Glycan
glycosyltransferase 6 domain containing 1	GLT6D1	360203	Glycan
glycosyltransferase 8 domain containing 1	GLT8D1	55830	Glycan
glycosyltransferase 8 domain containing 2	GLT8D2	83468	Glycan
glycosyltransferase 8 domain containing 3	GLT8D3	283464	Glycan
glycosyltransferase 8 domain containing 4	GLT8D4	727936	Glycan
glycosyltransferase-like domain containing 1	GTDC1	79712	Glycan
glycosyltransferase-like 1B	GYLTL1B	120071	Glycan
hyaluronan synthase 1	HAS1	3036	Glycan
hyaluronan synthase 2	HAS2	3037	Glycan
hyaluronan synthase 3	HAS3	3038	Glycan
like-glycosyltransferase	LARGE	9215	Glycan
lysocardiolipin acyltransferase	LYCAT	253558	Glycan
MFNG O-fucosylpeptide 3-beta-N-acetylglucosaminyltransferase	MFNG	4242	Glycan
mannosyl (alpha-1,3-)-glycoprotein beta-1,2-N-acetylglucosaminyltransferase	MGAT1	4245	Glycan
mannosyl (alpha-1,6-)-glycoprotein beta-1,2-N-acetylglucosaminyltransferase	MGAT2	4247	Glycan
mannosyl (beta-1,4-)-glycoprotein beta-1,4-N-acetylglucosaminyltransferase	MGAT3	4248	Glycan
Mannosyl (alpha-1,3-)-glycoprotein beta-1,4-N-acetylglucosaminyltransferase, isozyme A	MGAT4A	11320	Glycan
mannosyl (alpha-1,3-)-glycoprotein beta-1,4-N-acetylglucosaminyltransferase, isozyme B	MGAT4B	11282	Glycan
mannosyl (alpha-1,3-)-glycoprotein beta-1,4-N-acetylglucosaminyltransferase, isozyme C (putative)	MGAT4C	25834	Glycan
mannosyl (alpha-1,6-)-glycoprotein beta-1,6-N-acetyl-glucosaminyltransferase	MGAT5	4249	Glycan
mannosyl (alpha-1,6-)-glycoprotein beta-1,6-N-acetyl-glucosaminyltransferase, isozyme B	MGAT5B	146664	Glycan
N-acetylgalactosaminidase, alpha-	NAGA	4668	Glycan
N-acetylglucosamine-1-phosphodiester alpha-N-acetylglucosaminidase	NAGPA	51172	Glycan
protein O-fucosyltransferase 1	POFUT1	23509	Glycan
protein O-fucosyltransferase 2	POFUT2	23275	Glycan
protein O-linked mannose beta1,2-N-acetylglucosaminyltransferase	POMGNT1	55624	Glycan
protein-O-mannosyltransferase 1	POMT1	10585	Glycan
protein-O-mannosyltransferase 2	POMT2	29954	Glycan
ST3 beta-galactoside alpha-2,3-sialyltransferase 1	ST3GAL1	6482	Glycan
ST3 beta-galactoside alpha-2,3-sialyltransferase 2	ST3GAL2	6483	Glycan
ST3 beta-galactoside alpha-2,3-sialyltransferase 3	ST3GAL3	6487	Glycan
ST3 beta-galactoside alpha-2,3-sialyltransferase 4	ST3GAL4	6484	Glycan
ST3 beta-galactoside alpha-2,3-sialyltransferase 5	ST3GAL5	8869	Glycan
ST3 beta-galactoside alpha-2,3-sialyltransferase 6	ST3GAL6	10402	Glycan
ST6 beta-galactosamide alpha-2,6-sialyltranferase 1	ST6GAL1	6480	Glycan
ST6 beta-galactosamide alpha-2,6-sialyltranferase 2	ST6GAL2	84620	Glycan
ST6 (alpha-N-acetyl-neuraminyl-2,3-beta-galactosyl-1,3)-N-acetylgalactosaminide alpha-2,6-sialyltransferase 1	ST6GALNAC1	55808	Glycan
ST6 (alpha-N-acetyl-neuraminyl-2,3-beta-galactosyl-1,3)-N-acetylgalactosaminide alpha-2,6-sialyltransferase 2	ST6GALNAC2	10610	Glycan
ST6 (alpha-N-acetyl-neuraminyl-2,3-beta-galactosyl-1,3)-N-acetylgalactosaminide alpha-2,6-sialyltransferase 3	ST6GALNAC3	256435	Glycan
ST6 (alpha-N-acetyl-neuraminyl-2,3-beta-galactosyl-1,3)-N-acetylgalactosaminide alpha-2,6-sialyltransferase 4	ST6GALNAC4	27090	Glycan
ST6 (alpha-N-acetyl-neuraminyl-2,3-beta-galactosyl-1,3)-N-acetylgalactosaminide alpha-2,6-sialyltransferase 5	ST6GALNAC5	81849	Glycan
ST6 (alpha-N-acetyl-neuraminyl-2,3-beta-galactosyl-1,3)-N-acetylgalactosaminide alpha-2,6-sialyltransferase 6	ST6GALNAC6	30815	Glycan
ST8 alpha-N-acetyl-neuraminide alpha-2,8-sialyltransferase 1	ST8SIA1	6489	Glycan
ST8 alpha-N-acetyl-neuraminide alpha-2,8-sialyltransferase 2	ST8SIA2	8128	Glycan
ST8 alpha-N-acetyl-neuraminide alpha-2,8-sialyltransferase 3	ST8SIA3	51046	Glycan
ST8 alpha-N-acetyl-neuraminide alpha-2,8-sialyltransferase 4	ST8SIA4	7903	Glycan
ST8 alpha-N-acetyl-neuraminide alpha-2,8-sialyltransferase 5	ST8SIA5	29906	Glycan
ST8 alpha-N-acetyl-neuraminide alpha-2,8-sialyltransferase 6	ST8SIA6	338596	Glycan
Williams-Beuren syndrome chromosome region 17	WBSCR17	64409	Glycan
xylosyltransferase I	XYLT1	64131	Glycan
xylosyltransferase II	XYLT2	64132	Glycan
dolichyl-phosphate mannosyltransferase polypeptide 1, catalytic subunit	DPM1	8813	Glycan Anchor
dolichyl-phosphate mannosyltransferase polypeptide 2, regulatory subunit	DPM2	8818	Glycan Anchor
dolichyl-phosphate mannosyltransferase polypeptide 3	DPM3	54344	Glycan Anchor
glycosylphosphatidylinositol specific phospholipase D1	GPLD1	2822	Glycan Anchor
phosphatidylinositol glycan anchor biosynthesis, class A (paroxysmal nocturnal hemoglobinuria)	PIGA	5277	Glycan Anchor
phosphatidylinositol glycan anchor biosynthesis, class B	PIGB	9488	Glycan Anchor
phosphatidylinositol glycan anchor biosynthesis, class C	PIGC	5279	Glycan Anchor
phosphatidylinositol glycan anchor biosynthesis, class F	PIGF	5281	Glycan Anchor
phosphatidylinositol glycan anchor biosynthesis, class G	PIGG	54872	Glycan Anchor
phosphatidylinositol glycan anchor biosynthesis, class H	PIGH	5283	Glycan Anchor
phosphatidylinositol glycan anchor biosynthesis, class K	PIGK	10026	Glycan Anchor
phosphatidylinositol glycan anchor biosynthesis, class L	PIGL	9487	Glycan Anchor
phosphatidylinositol glycan anchor biosynthesis, class M	PIGM	93183	Glycan Anchor
phosphatidylinositol glycan anchor biosynthesis, class N	PIGN	23556	Glycan Anchor
phosphatidylinositol glycan anchor biosynthesis, class O	PIGO	84720	Glycan Anchor
phosphatidylinositol glycan anchor biosynthesis, class P	PIGP	51227	Glycan Anchor
phosphatidylinositol glycan anchor biosynthesis, class Q	PIGQ	9091	Glycan Anchor
phosphatidylinositol glycan anchor biosynthesis, class S	PIGS	94005	Glycan Anchor
phosphatidylinositol glycan anchor biosynthesis, class T	PIGT	51604	Glycan Anchor
phosphatidylinositol glycan anchor biosynthesis, class U	PIGU	128869	Glycan Anchor
phosphatidylinositol glycan anchor biosynthesis, class V	PIGV	55650	Glycan Anchor
phosphatidylinositol glycan anchor biosynthesis, class W	PIGW	284098	Glycan Anchor
phosphatidylinositol glycan anchor biosynthesis, class X	PIGX	54965	Glycan Anchor
phosphatidylinositol glycan anchor biosynthesis, class Y	PIGY	84992	Glycan Anchor
phosphatidylinositol glycan anchor biosynthesis, class Z	PIGZ	80235	Glycan Anchor
aspartylglucosaminidase	AGA	175	Glycan Degradation
ER degradation enhancer, mannosidase alpha-like 1	EDEM1	9695	Glycan Degradation
ER degradation enhancer, mannosidase alpha-like 2	EDEM2	55741	Glycan Degradation
ER degradation enhancer, mannosidase alpha-like 3	EDEM3	80267	Glycan Degradation
endo-beta-N-acetylglucosaminidase	FLJ21865	64772	Glycan Degradation
fucosidase, alpha-L- 1, tissue	FUCA1	2517	Glycan Degradation
fucosidase, alpha-L- 2, plasma	FUCA2	2519	Glycan Degradation
galactosamine (N-acetyl)-6-sulfate sulfatase (Morquio syndrome, mucopolysaccharidosis type IVA)	GALNS	2588	Glycan Degradation
galactosidase, alpha	GLA	2717	Glycan Degradation
galactosidase, beta 1	GLB1	2720	Glycan Degradation
galactosidase, beta 1-like	GLB1L	79411	Glycan Degradation
galactosidase, beta 2-like	GLB1L2	89944	Glycan Degradation
galactosidase, beta 1 like 3	GLB1L3	112937	Glycan Degradation
glucosamine (N-acetyl)-6-sulfatase (Sanfilippo disease IIID)	GNS	2799	Glycan Degradation
glucuronidase, beta	GUSB	2990	Glycan Degradation
hexosaminidase A (alpha polypeptide)	HEXA	3073	Glycan Degradation
hexosaminidase B (beta polypeptide)	HEXB	3074	Glycan Degradation
hexosaminidase (glycosyl hydrolase family 20, catalytic domain) containing	HEXDC	284004	Glycan Degradation
hyaluronoglucosaminidase 1	HYAL1	3373	Glycan Degradation
hyaluronoglucosaminidase 2	HYAL2	8692	Glycan Degradation
hyaluronoglucosaminidase 3	HYAL3	8372	Glycan Degradation
hyaluronoglucosaminidase 4	HYAL4	23553	Glycan Degradation
iduronate 2-sulfatase (Hunter syndrome)	IDS	3423	Glycan Degradation
iduronidase, alpha-L-	IDUA	3425	Glycan Degradation
lysozyme G-like 1	LYG1	129530	Glycan Degradation
lysozyme (renal amyloidosis)	LYZ	4069	Glycan Degradation
lysozyme-like 1	LYZL1	119180	Glycan Degradation
lysozyme-like 2	LYZL2	84569	Glycan Degradation
lysozyme-like 4	LYZL4	131375	Glycan Degradation
lysozyme-like 6	LYZL6	57151	Glycan Degradation
mannosidase, alpha, class 1A, member 1	MAN1A1	4121	Glycan Degradation
mannosidase, alpha, class 1A, member 2	MAN1A2	10905	Glycan Degradation
mannosidase, alpha, class 1B, member 1	MAN1B1	11253	Glycan Degradation
mannosidase, alpha, class 1C, member 1	MAN1C1	57134	Glycan Degradation
mannosidase, alpha, class 2A, member 1	MAN2A1	4124	Glycan Degradation
mannosidase, alpha, class 2A, member 2	MAN2A2	4122	Glycan Degradation
mannosidase, alpha, class 2B, member 1	MAN2B1	4125	Glycan Degradation
mannosidase, alpha, class 2B, member 2	MAN2B2	23324	Glycan Degradation
mannosidase, alpha, class 2C, member 1	MAN2C1	4123	Glycan Degradation
mannosidase, beta A, lysosomal	MANBA	4126	Glycan Degradation
mannosidase, beta A, lysosomal-like	MANBAL	63905	Glycan Degradation
mannosidase, endo-alpha	MANEA	79694	Glycan Degradation
mannosidase, endo-alpha-like	MANEAL	149175	Glycan Degradation
N-acetylglucosaminidase, alpha- (Sanfilippo disease IIIB)	NAGLU	4669	Glycan Degradation
sialidase 1 (lysosomal sialidase)	NEU1	4758	Glycan Degradation
sialidase 2 (cytosolic sialidase)	NEU2	4759	Glycan Degradation
sialidase 3 (membrane sialidase)	NEU3	10825	Glycan Degradation
sialidase 4	NEU4	129807	Glycan Degradation
chondroitin polymerizing factor	CHPF	79586	Glycan Sulfate
chondroitin sulfate glucuronyltransferase	CHPF2	54480	Glycan Sulfate
carbohydrate (keratan sulfate Gal-6) sulfotransferase 1	CHST1	8534	Glycan Sulfate
carbohydrate sulfotransferase 10	CHST10	9486	Glycan Sulfate
carbohydrate (chondroitin 4) sulfotransferase 11	CHST11	50515	Glycan Sulfate
carbohydrate (chondroitin 4) sulfotransferase 12	CHST12	55501	Glycan Sulfate
carbohydrate (chondroitin 4) sulfotransferase 13	CHST13	166012	Glycan Sulfate
carbohydrate (N-acetylgalactosamine 4-0) sulfotransferase 14	CHST14	113189	Glycan Sulfate
carbohydrate (N-acetylglucosamine-6-O) sulfotransferase 2	CHST2	9435	Glycan Sulfate
carbohydrate (chondroitin 6) sulfotransferase 3	CHST3	9469	Glycan Sulfate
carbohydrate (N-acetylglucosamine 6-O) sulfotransferase 4	CHST4	10164	Glycan Sulfate
carbohydrate (N-acetylglucosamine 6-O) sulfotransferase 5	CHST5	23563	Glycan Sulfate
carbohydrate (N-acetylglucosamine 6-O) sulfotransferase 6	CHST6	4166	Glycan Sulfate
carbohydrate (N-acetylglucosamine 6-O) sulfotransferase 7	CHST7	56548	Glycan Sulfate
carbohydrate (N-acetylgalactosamine 4-0) sulfotransferase 8	CHST8	64377	Glycan Sulfate
carbohydrate (N-acetylgalactosamine 4-0) sulfotransferase 9	CHST9	83539	Glycan Sulfate
carbohydrate (chondroitin) synthase 1	CHSY1	22856	Glycan Sulfate
chondroitin synthase-2	CHSY3	337876	Glycan Sulfate
chondroitin sulfate N-acetylgalactosaminyltransferase 1	CSGALNACT1	55790	Glycan Sulfate
chondroitin sulfate N-acetylgalactosaminyltransferase 2	CSGALNACT2	55454	Glycan Sulfate
galactose-3-O-sulfotransferase 1	GAL3ST1	9514	Glycan Sulfate
galactose-3-O-sulfotransferase 2	GAL3ST2	64090	Glycan Sulfate
galactose-3-O-sulfotransferase 3	GAL3ST3	89792	Glycan Sulfate
galactose-3-O-sulfotransferase 4	GAL3ST4	79690	Glycan Sulfate
N-sulfoglucosamine sulfohydrolase (sulfamidase)	SGSH	6448	Glycan Sulfate
sulfatase 1	SULF1	23213	Glycan Sulfate
sulfatase 2	SULF2	55959	Glycan Sulfate
uronyl-2-sulfotransferase	UST	10090	Glycan Sulfate
aminomethyltransferase	AMT	275	Glycine
Betaine-homocysteine methyltransferase	BHMT	635	Glycine
betaine-homocysteine methyltransferase 2	BHMT2	23743	Glycine
dimethylglycine dehydrogenase	DMGDH	29958	Glycine
glycine cleavage system protein H (aminomethyl carrier)	GCSH	2653	Glycine
glycine dehydrogenase (decarboxylating)	GLDC	2731	Glycine
sarcosine dehydrogenase	SARDH	1757	Glycine
ADP-dependent glucokinase	ADPGK	83440	Glycolysis
aldolase A, fructose-bisphosphate	ALDOA	226	Glycolysis
aldolase B, fructose-bisphosphate	ALDOB	229	Glycolysis
aldolase C, fructose-bisphosphate	ALDOC	230	Glycolysis
2,3-bisphosphoglycerate mutase	BPGM	669	Glycolysis
dihydrolipoamide S-acetyltransferase (E2 component of pyruvate dehydrogenase complex)	DLAT	1737	Glycolysis
enolase 1, (alpha)	ENO1	2023	Glycolysis
enolase 2 (gamma, neuronal)	ENO2	2026	Glycolysis
enolase 3 (beta, muscle)	ENO3	2027	Glycolysis
glyceraldehyde-3-phosphate dehydrogenase	GAPDH	2597	Glycolysis
glyceraldehyde-3-phosphate dehydrogenase, spermatogenic	GAPDHS	26330	Glycolysis
glucokinase (hexokinase 4, maturity onset diabetes of the young 2)	GCK	2645	Glycolysis
glucose phosphate isomerase	GPI	2821	Glycolysis
hexokinase 1	HK1	3098	Glycolysis
hexokinase 2	HK2	3099	Glycolysis
hexokinase 3 (white cell)	HK3	3101	Glycolysis
hexokinase domain containing 1	HKDC1	80201	Glycolysis
pyruvate dehydrogenase (lipoamide) alpha 1	PDHA1	5160	Glycolysis
pyruvate dehydrogenase (lipoamide) alpha 2	PDHA2	5161	Glycolysis
pyruvate dehydrogenase (lipoamide) beta	PDHB	5162	Glycolysis
pyruvate dehydrogenase complex, component X	PDHX	8050	Glycolysis
6-phosphofructo-2-kinase/fructose-2,6-biphosphatase 1	PFKFB1	5207	Glycolysis
6-phosphofructo-2-kinase/fructose-2,6-biphosphatase 2	PFKFB2	5208	Glycolysis
6-phosphofructo-2-kinase/fructose-2,6-biphosphatase 3	PFKFB3	5209	Glycolysis
6-phosphofructo-2-kinase/fructose-2,6-biphosphatase 4	PFKFB4	5210	Glycolysis
phosphofructokinase, liver	PFKL	5211	Glycolysis
phosphofructokinase, muscle	PFKM	5213	Glycolysis
phosphofructokinase, platelet	PFKP	5214	Glycolysis
phosphoglycerate mutase 1 (brain)	PGAM1	5223	Glycolysis
phosphoglycerate mutase 2 (muscle)	PGAM2	5224	Glycolysis
phosphoglycerate mutase family member 4	PGAM4	441531	Glycolysis
phosphoglycerate mutase family member 5	PGAM5	192111	Glycolysis
phosphoglycerate kinase 1	PGK1	5230	Glycolysis
phosphoglycerate kinase 2	PGK2	5232	Glycolysis
phosphoglucomutase 1	PGM1	5236	Glycolysis
phosphoglucomutase 2	PGM2	55276	Glycolysis
Phosphoglucomutase 2-like 1	PGM2L1	283209	Glycolysis
phosphoglucomutase 5	PGM5	5239	Glycolysis
pyruvate kinase, liver and RBC	PKLR	5313	Glycolysis
pyruvate kinase, muscle	PKM2	5315	Glycolysis
triosephosphate isomerase 1	TPI1	7167	Glycolysis
glyoxalase I	GLO1	2739	Glyoxylate
glyoxalase domain containing 4	GLOD4	51031	Glyoxylate
glyoxalase domain containing 5	GLOD5	392465	Glyoxylate
hydroxyacid oxidase (glycolate oxidase) 1	HAO1	54363	Glyoxylate
hydroxyacid oxidase 2 (long chain)	HAO2	51179	Glyoxylate
exostoses (multiple) 1	EXT1	2131	Heparin Sulfate
exostoses (multiple) 2	EXT2	2132	Heparin Sulfate
exostoses (multiple) 3	EXT3	2133	Heparin Sulfate
exostoses (multiple)-like 1	EXTL1	2134	Heparin Sulfate
exostoses (multiple)-like 2	EXTL2	2135	Heparin Sulfate
exostoses (multiple)-like 3	EXTL3	2137	Heparin Sulfate
glucuronic acid epimerase	GLCE	26035	Heparin Sulfate
heparan-alpha-glucosaminide N-acetyltransferase	HGSNAT	138050	Heparin Sulfate
heparanase	HPSE	10855	Heparin Sulfate
heparanase 2	HPSE2	60495	Heparin Sulfate
heparan sulfate 2-O-sulfotransferase 1	HS2ST1	9653	Heparin Sulfate
heparan sulfate (glucosamine) 3-O-sulfotransferase 1	HS3ST1	9957	Heparin Sulfate
heparan sulfate (glucosamine) 3-O-sulfotransferase 2	HS3ST2	9956	Heparin Sulfate
heparan sulfate (glucosamine) 3-O-sulfotransferase 3A1	HS3ST3A1	9955	Heparin Sulfate
Heparan sulfate (glucosamine) 3-O-sulfotransferase 3B1	HS3ST3B1	9953	Heparin Sulfate
heparan sulfate (glucosamine) 3-O-sulfotransferase 4	HS3ST4	9951	Heparin Sulfate
heparan sulfate (glucosamine) 3-O-sulfotransferase 5	HS3ST5	222537	Heparin Sulfate
heparan sulfate (glucosamine) 3-O-sulfotransferase 6	HS3ST6	64711	Heparin Sulfate
Heparan sulfate 6-O-sulfotransferase 1	HS6ST1	9394	Heparin Sulfate
heparan sulfate 6-O-sulfotransferase 2	HS6ST2	90161	Heparin Sulfate
heparan sulfate 6-O-sulfotransferase 3	HS6ST3	266722	Heparin Sulfate
N-deacetylase/N-sulfotransferase (heparan glucosaminyl) 1	NDST1	3340	Heparin Sulfate
N-deacetylase/N-sulfotransferase (heparan glucosaminyl) 2	NDST2	8509	Heparin Sulfate
N-deacetylase/N-sulfotransferase (heparan glucosaminyl) 3	NDST3	9348	Heparin Sulfate
N-deacetylase/N-sulfotransferase (heparan glucosaminyl) 4	NDST4	64579	Heparin Sulfate
amidohydrolase domain containing 1	AMDHD1	144193	Histidine
amidohydrolase domain containing 2	AMDHD2	51005	Histidine
formiminotransferase cyclodeaminase	FTCD	10841	Histidine
histidine ammonia-lyase	HAL	3034	Histidine
Histidine decarboxylase	HDC	3067	Histidine
histamine N-methyltransferase	HNMT	3176	Histidine
Urocanase domain containing 1	UROC1	131669	Histidine
arylalkylamine N-acetyltransferase	AANAT	15	Hormone
angiotensin I converting enzyme (peptidyl-dipeptidase A) 1	ACE	1636	Hormone
angiotensin I converting enzyme (peptidyl-dipeptidase A) 2	ACE2	59272	Hormone
arachidonate 12-lipoxygenase	ALOX12	239	Hormone
arachidonate 12-lipoxygenase, 12R type	ALOX12B	242	Hormone
arachidonate 15-lipoxygenase	ALOX15	246	Hormone
arachidonate 15-lipoxygenase, type B	ALOX15B	247	Hormone
arachidonate 5-lipoxygenase	ALOX5	240	Hormone
arachidonate 5-lipoxygenase-activating protein	ALOX5AP	241	Hormone
arachidonate lipoxygenase 3	ALOXE3	59344	Hormone
amine oxidase (flavin containing) domain 1	AOF1	221656	Hormone
amine oxidase (flavin containing) domain 2	AOF2	23028	Hormone
acetylserotonin O-methyltransferase	ASMT	438	Hormone
acetylserotonin O-methyltransferase-like	ASMTL	8623	Hormone
cytochrome P450, family 20, subfamily A, polypeptide 1	CYP20A1	57404	Hormone
deiodinase, iodothyronine, type I	DIO1	1733	Hormone
deiodinase, iodothyronine, type II	DIO2	1734	Hormone
deiodinase, iodothyronine, type III	DIO3	1735	Hormone
hydroxyprostaglandin dehydrogenase 15-(NAD)	HPGD	3248	Hormone
iodotyrosine deiodinase	IYD	389434	Hormone
leucyl/cystinyl aminopeptidase	LNPEP	4012	Hormone
leukotriene A4 hydrolase	LTA4H	4048	Hormone
leukotriene C4 synthase	LTC4S	4056	Hormone
membrane metallo-endopeptidase	MME	4311	Hormone
membrane metallo-endopeptidase-like 1	MMEL1	79258	Hormone
prostaglandin D2 synthase, hematopoietic	PGDS	27306	Hormone
prostaglandin D2 synthase 21kDa (brain)	PTGDS	5730	Hormone
prostaglandin E synthase	PTGES	9536	Hormone
prostaglandin E synthase 2	PTGES2	80142	Hormone
prostaglandin E synthase 3 (cytosolic)	PTGES3	10728	Hormone
prostaglandin I2 (prostacyclin) synthase	PTGIS	5740	Hormone
prostaglandin reductase 1	PTGR1	22949	Hormone
prostaglandin reductase 2	PTGR2	145482	Hormone
prostaglandin-endoperoxide synthase 1 (prostaglandin G/H synthase and cyclooxygenase)	PTGS1	5742	Hormone
prostaglandin-endoperoxide synthase 2 (prostaglandin G/H synthase and cyclooxygenase)	PTGS2	5743	Hormone
thromboxane A synthase 1 (platelet, cytochrome P450, family 5, subfamily A)	TBXAS1	6916	Hormone
thyroid peroxidase	TPO	7173	Hormone
CDP-diacylglycerol--inositol 3-phosphatidyltransferase (phosphatidylinositol synthase)	CDIPT	10423	Inositol Phosphate
FIG4 homolog (S. cerevisiae)	FIG4	9896	Inositol Phosphate
inositol(myo)-1(or 4)-monophosphatase 1	IMPA1	3612	Inositol Phosphate
inositol(myo)-1(or 4)-monophosphatase 2	IMPA2	3613	Inositol Phosphate
inositol monophosphatase domain containing 1	IMPAD1	54928	Inositol Phosphate
inositol polyphosphate-1-phosphatase	INPP1	3628	Inositol Phosphate
inositol polyphosphate-4-phosphatase, type I, 107kDa	INPP4A	3631	Inositol Phosphate
inositol polyphosphate-4-phosphatase, type II, 105kDa	INPP4B	8821	Inositol Phosphate
inositol polyphosphate-5-phosphatase, 40kDa	INPP5A	3632	Inositol Phosphate
inositol polyphosphate-5-phosphatase, 75kDa	INPP5B	3633	Inositol Phosphate
inositol polyphosphate-5-phosphatase, 145kDa	INPP5D	3635	Inositol Phosphate
inositol polyphosphate-5-phosphatase, 72 kDa	INPP5E	56623	Inositol Phosphate
inositol polyphosphate-5-phosphatase F	INPP5F	22876	Inositol Phosphate
inositol polyphosphate-5-phosphatase J	INPP5J	27124	Inositol Phosphate
inositol polyphosphate-5-phosphatase K	INPP5K	51763	Inositol Phosphate
inositol polyphosphate phosphatase-like 1	INPPL1	3636	Inositol Phosphate
inositol hexaphosphate kinase 1	IP6K1	9807	Inositol Phosphate
inositol hexaphosphate kinase 2	IP6K2	51447	Inositol Phosphate
inositol hexaphosphate kinase 3	IP6K3	117283	Inositol Phosphate
inositol polyphosphate multikinase	IPMK	253430	Inositol Phosphate
inositol 1,3,4,5,6-pentakisphosphate 2-kinase	IPPK	64768	Inositol Phosphate
myo-inositol 1-phosphate synthase A1	ISYNA1	51477	Inositol Phosphate
inositol 1,3,4-triphosphate 5/6 kinase	ITPK1	3705	Inositol Phosphate
inositol 1,4,5-trisphosphate 3-kinase A	ITPKA	3706	Inositol Phosphate
inositol 1,4,5-trisphosphate 3-kinase B	ITPKB	3707	Inositol Phosphate
inositol 1,4,5-trisphosphate 3-kinase C	ITPKC	80271	Inositol Phosphate
multiple inositol polyphosphate histidine phosphatase, 1	MINPP1	9562	Inositol Phosphate
myo-inositol oxygenase	MIOX	55586	Inositol Phosphate
GPI deacylase	PGAP1	80055	Inositol Phosphate
phosphatidylinositol 4-kinase type 2 alpha	PI4K2A	55361	Inositol Phosphate
Phosphatidylinositol 4-kinase type 2 beta	PI4K2B	55300	Inositol Phosphate
phosphatidylinositol 4-kinase, catalytic, alpha	PI4KA	5297	Inositol Phosphate
phosphatidylinositol 4-kinase, catalytic, beta	PI4KB	5298	Inositol Phosphate
phosphoinositide-3-kinase, class 2, alpha polypeptide	PIK3C2A	5286	Inositol Phosphate
phosphoinositide-3-kinase, class 2, beta polypeptide	PIK3C2B	5287	Inositol Phosphate
phosphoinositide-3-kinase, class 2, gamma polypeptide	PIK3C2G	5288	Inositol Phosphate
phosphoinositide-3-kinase, class 3	PIK3C3	5289	Inositol Phosphate
phosphoinositide-3-kinase, catalytic, alpha polypeptide	PIK3CA	5290	Inositol Phosphate
phosphoinositide-3-kinase, catalytic, beta polypeptide	PIK3CB	5291	Inositol Phosphate
phosphoinositide-3-kinase, catalytic, delta polypeptide	PIK3CD	5293	Inositol Phosphate
phosphoinositide-3-kinase, catalytic, gamma polypeptide	PIK3CG	5294	Inositol Phosphate
phosphoinositide-3-kinase, regulatory subunit 1 (p85 alpha)	PIK3R1	5295	Inositol Phosphate
phosphoinositide-3-kinase, regulatory subunit 2 (p85 beta)	PIK3R2	5296	Inositol Phosphate
phosphoinositide-3-kinase, regulatory subunit 3 (p55, gamma)	PIK3R3	8503	Inositol Phosphate
phosphoinositide-3-kinase, regulatory subunit 4, p150	PIK3R4	30849	Inositol Phosphate
phosphoinositide-3-kinase, regulatory subunit 5, p101	PIK3R5	23533	Inositol Phosphate
phosphoinositide-3-kinase, regulatory subunit 6	PIK3R6	146850	Inositol Phosphate
phosphatidylinositol-5-phosphate 4-kinase, type II, alpha	PIP4K2A	5305	Inositol Phosphate
phosphatidylinositol-5-phosphate 4-kinase, type II, beta	PIP4K2B	8396	Inositol Phosphate
phosphatidylinositol-5-phosphate 4-kinase, type II, gamma	PIP4K2C	79837	Inositol Phosphate
phosphatidylinositol-4-phosphate 5-kinase, type I, alpha	PIP5K1A	8394	Inositol Phosphate
phosphatidylinositol-4-phosphate 5-kinase, type I, beta	PIP5K1B	8395	Inositol Phosphate
phosphatidylinositol-4-phosphate 5-kinase, type I, gamma	PIP5K1C	23396	Inositol Phosphate
phosphatidylinositol-3-phosphate/phosphatidylinositol 5-kinase, type III	PIP5K3	200576	Inositol Phosphate
phosphatidylinositol-4-phosphate 5-kinase-like 1	PIP5KL1	138429	Inositol Phosphate
phosphatase and tensin homolog	PTEN	5728	Inositol Phosphate
synaptojanin 1	SYNJ1	8867	Inositol Phosphate
synaptojanin 2	SYNJ2	8871	Inositol Phosphate
ATPase, class VI, type 11A	ATP11A	23250	Ion Transport
ATPase, class VI, type 11B	ATP11B	23200	Ion Transport
ATPase, class VI, type 11C	ATP11C	286410	Ion Transport
ATPase, H+/K+ transporting, nongastric, alpha polypeptide	ATP12A	479	Ion Transport
ATPase, Na+/K+ transporting, alpha 1 polypeptide	ATP1A1	476	Ion Transport
ATPase, Na+/K+ transporting, alpha 2 polypeptide	ATP1A2	477	Ion Transport
ATPase, Na+/K+ transporting, alpha 3 polypeptide	ATP1A3	478	Ion Transport
ATPase, Na+/K+ transporting, alpha 4 polypeptide	ATP1A4	480	Ion Transport
ATPase, Na+/K+ transporting, beta 1 polypeptide	ATP1B1	481	Ion Transport
ATPase, Na+/K+ transporting, beta 2 polypeptide	ATP1B2	482	Ion Transport
ATPase, Na+/K+ transporting, beta 3 polypeptide	ATP1B3	483	Ion Transport
ATPase, (Na+)/K+ transporting, beta 4 polypeptide	ATP1B4	23439	Ion Transport
ATPase, Ca++ transporting, cardiac muscle, fast twitch 1	ATP2A1	487	Ion Transport
ATPase, Ca++ transporting, cardiac muscle, slow twitch 2	ATP2A2	488	Ion Transport
ATPase, Ca++ transporting, ubiquitous	ATP2A3	489	Ion Transport
ATPase, Ca++ transporting, plasma membrane 1	ATP2B1	490	Ion Transport
ATPase, Ca++ transporting, plasma membrane 2	ATP2B2	491	Ion Transport
ATPase, Ca++ transporting, plasma membrane 3	ATP2B3	492	Ion Transport
ATPase, Ca++ transporting, plasma membrane 4	ATP2B4	493	Ion Transport
ATPase, Ca++-sequestering	ATP2C1	27032	Ion Transport
ATPase, Ca++ transporting, type 2C, member 2	ATP2C2	9914	Ion Transport
ATPase, Mg++ transporting	ATP3	494	Ion Transport
ATPase, H+/K+ exchanging, gastric, alpha polypeptide	ATP4A	495	Ion Transport
ATPase, H+/K+ exchanging, beta polypeptide	ATP4B	496	Ion Transport
ATPase, Cu++ transporting, alpha polypeptide	ATP7A	538	Ion Transport
ATPase, Cu++ transporting, beta polypeptide	ATP7B	540	Ion Transport
Bestrophin 1	BEST1	7439	Ion Transport
Bestrophin 2	BEST2	54831	Ion Transport
Bestrophin 3	BEST3	144453	Ion Transport
Bestrophin 4	BEST4	266675	Ion Transport
Bartter syndrome, infantile, with sensorineural deafness (Barttin)	BSND	7809	Ion Transport
Chromosome 14 open reading frame 68	C14orf68	283600	Ion Transport
Chromosome 20 open reading frame 59	C20orf59	63910	Ion Transport
Chromosome 6 open reading frame 192	C6orf192	116843	Ion Transport
calcium channel, voltage-dependent, P/Q type, alpha 1A subunit	CACNA1A	773	Ion Transport
calcium channel, voltage-dependent, N type, alpha 1B subunit	CACNA1B	774	Ion Transport
calcium channel, voltage-dependent, L type, alpha 1C subunit	CACNA1C	775	Ion Transport
calcium channel, voltage-dependent, L type, alpha 1D subunit	CACNA1D	776	Ion Transport
calcium channel, voltage-dependent, R type, alpha 1E subunit	CACNA1E	777	Ion Transport
calcium channel, voltage-dependent, alpha 1F subunit	CACNA1F	778	Ion Transport
calcium channel, voltage-dependent, T type, alpha 1G subunit	CACNA1G	8913	Ion Transport
calcium channel, voltage-dependent, T type, alpha 1H subunit	CACNA1H	8912	Ion Transport
calcium channel, voltage-dependent, T type, alpha 1I subunit	CACNA1I	8911	Ion Transport
calcium channel, voltage-dependent, L type, alpha 1S subunit	CACNA1S	779	Ion Transport
calcium channel, voltage-dependent, alpha2/delta subunit 1	CACNA2D1	781	Ion Transport
calcium channel, voltage-dependent, alpha 2/delta subunit 2	CACNA2D2	9254	Ion Transport
calcium channel, voltage-dependent, alpha2/delta subunit 3	CACNA2D3	55799	Ion Transport
calcium channel, voltage-dependent, alpha 2/delta subunit 4	CACNA2D4	93589	Ion Transport
calcium channel, voltage-dependent, beta 1 subunit	CACNB1	782	Ion Transport
calcium channel, voltage-dependent, beta 2 subunit	CACNB2	783	Ion Transport
calcium channel, voltage-dependent, beta 3 subunit	CACNB3	784	Ion Transport
calcium channel, voltage-dependent, beta 4 subunit	CACNB4	785	Ion Transport
calcium channel, voltage-dependent, gamma subunit 1	CACNG1	786	Ion Transport
calcium channel, voltage-dependent, gamma subunit 2	CACNG2	10369	Ion Transport
calcium channel, voltage-dependent, gamma subunit 3	CACNG3	10368	Ion Transport
calcium channel, voltage-dependent, gamma subunit 4	CACNG4	27092	Ion Transport
calcium channel, voltage-dependent, gamma subunit 5	CACNG5	27091	Ion Transport
calcium channel, voltage-dependent, gamma subunit 6	CACNG6	59285	Ion Transport
calcium channel, voltage-dependent, gamma subunit 7	CACNG7	59284	Ion Transport
calcium channel, voltage-dependent, gamma subunit 8	CACNG8	59283	Ion Transport
cation channel, sperm associated 1	CATSPER1	117144	Ion Transport
cation channel, sperm associated 2	CATSPER2	117155	Ion Transport
cation channel, sperm associated 3	CATSPER3	347732	Ion Transport
cation channel, sperm-associated, beta	CATSPERB	79820	Ion Transport
Cystic fibrosis transmembrane conductance regulator (ATP-binding cassette sub-family C, member 7)	CFTR	1080	Ion Transport
Cholinergic receptor, nicotinic, alpha 1 (muscle)	CHRNA1	1134	Ion Transport
Cholinergic receptor, nicotinic, alpha 10	CHRNA10	57053	Ion Transport
Cholinergic receptor, nicotinic, alpha 2 (neuronal)	CHRNA2	1135	Ion Transport
Cholinergic receptor, nicotinic, alpha 3	CHRNA3	1136	Ion Transport
Cholinergic receptor, nicotinic, alpha 4	CHRNA4	1137	Ion Transport
Cholinergic receptor, nicotinic, alpha 5	CHRNA5	1138	Ion Transport
Cholinergic receptor, nicotinic, alpha 6	CHRNA6	8973	Ion Transport
Cholinergic receptor, nicotinic, alpha 7	CHRNA7	1139	Ion Transport
Cholinergic receptor, nicotinic, alpha 9	CHRNA9	55584	Ion Transport
Cholinergic receptor, nicotinic, beta 1 (muscle)	CHRNB1	1140	Ion Transport
Cholinergic receptor, nicotinic, beta 2 (neuronal)	CHRNB2	1141	Ion Transport
Cholinergic receptor, nicotinic, beta 3	CHRNB3	1142	Ion Transport
Cholinergic receptor, nicotinic, beta 4	CHRNB4	1143	Ion Transport
Cholinergic receptor, nicotinic, delta	CHRND	1144	Ion Transport
Cholinergic receptor, nicotinic, epsilon	CHRNE	1145	Ion Transport
Cholinergic receptor, nicotinic, gamma	CHRNG	1146	Ion Transport
chloride channel calcium activated 1	CLCA1	1179	Ion Transport
chloride channel calcium activated 2	CLCA2	9635	Ion Transport
chloride channel calcium activated 3	CLCA3	9629	Ion Transport
chloride channel calcium activated 4	CLCA4	22802	Ion Transport
chloride channel CLIC-like 1	CLCC1	23155	Ion Transport
chloride channel 1	CLCN1	1180	Ion Transport
chloride channel 2	CLCN2	1181	Ion Transport
chloride channel 3	CLCN3	1182	Ion Transport
chloride channel 4-2	CLCN4	1183	Ion Transport
chloride channel 5	CLCN5	1184	Ion Transport
chloride channel 6	CLCN6	1185	Ion Transport
chloride channel 7	CLCN7	1186	Ion Transport
Chloride channel Ka	CLCNKA	1187	Ion Transport
chloride channel Kb	CLCNKB	1188	Ion Transport
chloride intracellular channel 1	CLIC1	1192	Ion Transport
chloride intracellular channel 2	CLIC2	1193	Ion Transport
chloride intracellular channel 3	CLIC3	9022	Ion Transport
chloride intracellular channel 4 (mitochondrial)	CLIC4	25932	Ion Transport
chloride intracellular channel 5	CLIC5	53405	Ion Transport
chloride intracellular channel 6	CLIC6	54102	Ion Transport
cyclic nucleotide gated channel alpha 1	CNGA1	1259	Ion Transport
Cyclic nucleotide gated channel alpha 2	CNGA2	1260	Ion Transport
cyclic nucleotide gated channel alpha 3	CNGA3	1261	Ion Transport
cyclic nucleotide gated channel alpha 4	CNGA4	1262	Ion Transport
cyclic nucleotide gated channel beta 1	CNGB1	1258	Ion Transport
cyclic nucleotide gated channel beta 3	CNGB3	54714	Ion Transport
Gamma-aminobutyric acid (GABA) A receptor, alpha 1	GABRA1	2554	Ion Transport
Gamma-aminobutyric acid (GABA) A receptor, alpha 2	GABRA2	2555	Ion Transport
Gamma-aminobutyric acid (GABA) A receptor, alpha 3	GABRA3	2556	Ion Transport
Gamma-aminobutyric acid (GABA) A receptor, alpha 4	GABRA4	2557	Ion Transport
Gamma-aminobutyric acid (GABA) A receptor, alpha 5	GABRA5	2558	Ion Transport
Gamma-aminobutyric acid (GABA) A receptor, alpha 6	GABRA6	2559	Ion Transport
Gamma-aminobutyric acid (GABA) A receptor, beta 1	GABRB1	2560	Ion Transport
Gamma-aminobutyric acid (GABA) A receptor, beta 2	GABRB2	2561	Ion Transport
Gamma-aminobutyric acid (GABA) A receptor, beta 3	GABRB3	2562	Ion Transport
Gamma-aminobutyric acid (GABA) A receptor, delta	GABRD	2563	Ion Transport
Gamma-aminobutyric acid (GABA) A receptor, epsilon	GABRE	2564	Ion Transport
Gamma-aminobutyric acid (GABA) A receptor, gamma 1	GABRG1	2565	Ion Transport
Gamma-aminobutyric acid (GABA) A receptor, gamma 2	GABRG2	2566	Ion Transport
Gamma-aminobutyric acid (GABA) A receptor, gamma 3	GABRG3	2567	Ion Transport
Gamma-aminobutyric acid (GABA) A receptor, pi	GABRP	2568	Ion Transport
Gamma-aminobutyric acid (GABA) receptor, theta	GABRQ	55879	Ion Transport
Gamma-aminobutyric acid (GABA) receptor, rho 1	GABRR1	2569	Ion Transport
Gamma-aminobutyric acid (GABA) receptor, rho 2	GABRR2	2570	Ion Transport
Gamma-aminobutyric acid (GABA) receptor, rho 3	GABRR3	200959	Ion Transport
Glycine receptor, alpha 1 (startle disease/hyperekplexia)	GLRA1	2741	Ion Transport
Glycine receptor, alpha 2	GLRA2	2742	Ion Transport
Glycine receptor, alpha 3	GLRA3	8001	Ion Transport
Glycine receptor, alpha 4	GLRA4	441509	Ion Transport
Glycine receptor, beta	GLRB	2743	Ion Transport
Glutamate receptor, ionotropic, AMPA 1	GRIA1	2890	Ion Transport
Glutamate receptor, ionotropic, AMPA 2	GRIA2	2891	Ion Transport
Glutamate receptor, ionotrophic, AMPA 3	GRIA3	2892	Ion Transport
Glutamate receptor, ionotrophic, AMPA 4	GRIA4	2893	Ion Transport
Glutamate receptor, ionotropic, delta 1	GRID1	2894	Ion Transport
Glutamate receptor, ionotropic, delta 2	GRID2	2895	Ion Transport
Glutamate receptor, ionotropic, kainate 1	GRIK1	2897	Ion Transport
Glutamate receptor, ionotropic, kainate 2	GRIK2	2898	Ion Transport
Glutamate receptor, ionotropic, kainate 3	GRIK3	2899	Ion Transport
Glutamate receptor, ionotropic, kainate 4	GRIK4	2900	Ion Transport
Glutamate receptor, ionotropic, kainate 5	GRIK5	2901	Ion Transport
Glutamate receptor, ionotropic, N-methyl D-aspartate 1	GRIN1	2902	Ion Transport
Glutamate receptor, ionotropic, N-methyl D-aspartate 2A	GRIN2A	2903	Ion Transport
Glutamate receptor, ionotropic, N-methyl D-aspartate 2B	GRIN2B	2904	Ion Transport
Glutamate receptor, ionotropic, N-methyl D-aspartate 2C	GRIN2C	2905	Ion Transport
Glutamate receptor, ionotropic, N-methyl D-aspartate 2D	GRIN2D	2906	Ion Transport
Glutamate receptor, ionotropic, N-methyl-D-aspartate 3A	GRIN3A	116443	Ion Transport
Glutamate receptor, ionotropic, N-methyl-D-aspartate 3B	GRIN3B	116444	Ion Transport
hyperpolarization activated cyclic nucleotide-gated potassium channel 1	HCN1	348980	Ion Transport
hyperpolarization activated cyclic nucleotide-gated potassium channel 2	HCN2	610	Ion Transport
hyperpolarization activated cyclic nucleotide-gated potassium channel 3	HCN3	57657	Ion Transport
hyperpolarization activated cyclic nucleotide-gated potassium channel 4	HCN4	10021	Ion Transport
5-hydroxytryptamine (serotonin) receptor 3A	HTR3A	3359	Ion Transport
5-hydroxytryptamine (serotonin) receptor 3B	HTR3B	9177	Ion Transport
5-hydroxytryptamine (serotonin) receptor 3, family member C	HTR3C	170572	Ion Transport
5-hydroxytryptamine (serotonin) receptor 3 family member D	HTR3D	200909	Ion Transport
5-hydroxytryptamine (serotonin) receptor 3, family member E	HTR3E	285242	Ion Transport
Inositol 1,4,5-triphosphate receptor, type 1	ITPR1	3708	Ion Transport
inositol 1,4,5-triphosphate receptor, type 2	ITPR2	3709	Ion Transport
inositol 1,4,5-triphosphate receptor, type 3	ITPR3	3710	Ion Transport
potassium voltage-gated channel, shaker-related subfamily, member 1	KCNA1	3736	Ion Transport
potassium voltage-gated channel, shaker-related subfamily, member 10	KCNA10	3744	Ion Transport
potassium voltage-gated channel, shaker-related subfamily, member 2	KCNA2	3737	Ion Transport
potassium voltage-gated channel, shaker-related subfamily, member 3	KCNA3	3738	Ion Transport
potassium voltage-gated channel, shaker-related subfamily, member 4	KCNA4	3739	Ion Transport
potassium voltage-gated channel, shaker-related subfamily, member 5	KCNA5	3741	Ion Transport
potassium voltage-gated channel, shaker-related, subfamily, member 6	KCNA6	3742	Ion Transport
potassium voltage-gated channel, shaker-related subfamily, member 7	KCNA7	3743	Ion Transport
potassium voltage-gated channel, shaker-related subfamily, beta member 1	KCNAB1	7881	Ion Transport
potassium voltage-gated channel, shaker-related subfamily, beta member 2	KCNAB2	8514	Ion Transport
potassium voltage-gated channel, shaker-related subfamily, beta member 3	KCNAB3	9196	Ion Transport
potassium voltage gated channel, Shab-related subfamily, member 1	KCNB1	3745	Ion Transport
potassium voltage gated channel, Shab-related subfamily, member 2	KCNB2	9312	Ion Transport
potassium voltage gated channel, Shaw-related subfamily, member 1	KCNC1	3746	Ion Transport
potassium voltage gated channel, Shaw-related subfamily, member 2	KCNC2	3747	Ion Transport
potassium voltage gated channel, Shaw-related subfamily, member 3	KCNC3	3748	Ion Transport
potassium voltage gated channel, Shaw-related subfamily, member 4	KCNC4	3749	Ion Transport
potassium voltage-gated channel, Shal-related family, member 1	KCND1	3750	Ion Transport
potassium voltage-gated channel, Shal-related family, member 2	KCND2	3751	Ion Transport
potassium voltage-gated channel, Shal-related family, member 3	KCND3	3752	Ion Transport
potassium voltage-gated channel, Isk-related subfamily, member 1	KCNE1	3753	Ion Transport
potassium voltage-gated channel, Isk-related family, member 1-like	KCNE1L	23630	Ion Transport
potassium voltage-gated channel, Isk-related subfamily, gene 2	KCNE2	9992	Ion Transport
potassium voltage-gated channel, Isk-related subfamily, gene 3	KCNE3	10008	Ion Transport
potassium voltage-gated channel, Isk-related subfamily, gene 4	KCNE4	23704	Ion Transport
potassium voltage-gated channel, subfamily F, member 1	KCNF1	3754	Ion Transport
potassium voltage-gated channel, subfamily G, member 1	KCNG1	3755	Ion Transport
potassium voltage-gated channel, subfamily G, member 2	KCNG2	26251	Ion Transport
potassium voltage-gated channel, subfamily G, member 3	KCNG3	170850	Ion Transport
potassium voltage-gated channel, subfamily G, member 4	KCNG4	93107	Ion Transport
potassium voltage-gated channel, subfamily H (eag-related), member 1	KCNH1	3756	Ion Transport
potassium voltage-gated channel, subfamily H (eag-related), member 2	KCNH2	3757	Ion Transport
potassium voltage-gated channel, subfamily H (eag-related), member 3	KCNH3	23416	Ion Transport
potassium voltage-gated channel, subfamily H (eag-related), member 4	KCNH4	23415	Ion Transport
potassium voltage-gated channel, subfamily H (eag-related), member 5	KCNH5	27133	Ion Transport
potassium voltage-gated channel, subfamily H (eag-related), member 6	KCNH6	81033	Ion Transport
potassium voltage-gated channel, subfamily H (eag-related), member 7	KCNH7	90134	Ion Transport
potassium voltage-gated channel, subfamily H (eag-related), member 8	KCNH8	131096	Ion Transport
potassium inwardly-rectifying channel, subfamily J, member 1	KCNJ1	3758	Ion Transport
potassium inwardly-rectifying channel, subfamily J, member 10	KCNJ10	3766	Ion Transport
potassium inwardly rectifying channel, subfamily J, member 11	KCNJ11	3767	Ion Transport
potassium inwardly-rectifying channel, subfamily J, member 12	KCNJ12	3768	Ion Transport
potassium inwardly-rectifying channel, subfamily J, member 13	KCNJ13	3769	Ion Transport
potassium inwardly-rectifying channel, subfamily J, member 14	KCNJ14	3770	Ion Transport
potassium inwardly-rectifying channel, subfamily J, member 15	KCNJ15	3772	Ion Transport
potassium inwardly-rectifying channel, subfamily J, member 16	KCNJ16	3773	Ion Transport
potassium inwardly-rectifying channel, subfamily J, member 2	KCNJ2	3759	Ion Transport
potassium inwardly-rectifying channel, subfamily J, member 3	KCNJ3	3760	Ion Transport
potassium inwardly-rectifying channel, subfamily J, member 4	KCNJ4	3761	Ion Transport
potassium inwardly-rectifying channel, subfamily J, member 5	KCNJ5	3762	Ion Transport
potassium inwardly-rectifying channel, subfamily J, member 6	KCNJ6	3763	Ion Transport
potassium inwardly-rectifying channel, subfamily J, member 8	KCNJ8	3764	Ion Transport
potassium inwardly-rectifying channel, subfamily J, member 9	KCNJ9	3765	Ion Transport
potassium channel, subfamily K, member 1	KCNK1	3775	Ion Transport
potassium channel, subfamily K, member 10	KCNK10	54207	Ion Transport
potassium channel, subfamily K, member 12	KCNK12	56660	Ion Transport
potassium channel, subfamily K, member 13	KCNK13	56659	Ion Transport
potassium channel, subfamily K, member 15	KCNK15	60598	Ion Transport
potassium channel, subfamily K, member 16	KCNK16	83795	Ion Transport
potassium channel, subfamily K, member 17	KCNK17	89822	Ion Transport
Potassium channel, subfamily K, member 18	KCNK18	338567	Ion Transport
potassium channel, subfamily K, member 2	KCNK2	3776	Ion Transport
potassium channel, subfamily K, member 3	KCNK3	3777	Ion Transport
potassium channel, subfamily K, member 4	KCNK4	50801	Ion Transport
potassium channel, subfamily K, member 5	KCNK5	8645	Ion Transport
potassium inwardly-rectifying channel, subfamily K, member 6	KCNK6	9424	Ion Transport
potassium channel, subfamily K, member 7	KCNK7	10089	Ion Transport
potassium channel, subfamily K, member 9	KCNK9	51305	Ion Transport
potassium large conductance calcium-activated channel, subfamily M, alpha member 1	KCNMA1	3778	Ion Transport
potassium large conductance calcium-activated channel, subfamily M, beta member 1	KCNMB1	3779	Ion Transport
potassium large conductance calcium-activated channel, subfamily M, beta member 2	KCNMB2	10242	Ion Transport
potassium large conductance calcium-activated channel, subfamily M beta member 3	KCNMB3	27094	Ion Transport
potassium large conductance calcium-activated channel, subfamily M, beta member 4	KCNMB4	27345	Ion Transport
potassium intermediate/small conductance calcium-activated channel, subfamily N, member 1	KCNN1	3780	Ion Transport
potassium intermediate/small conductance calcium-activated channel, subfamily N, member 2	KCNN2	3781	Ion Transport
potassium intermediate/small conductance calcium-activated channel, subfamily N, member 3	KCNN3	3782	Ion Transport
potassium intermediate/small conductance calcium-activated channel, subfamily N, member 4	KCNN4	3783	Ion Transport
potassium voltage-gated channel, subfamily Q, member 1	KCNQ1	3784	Ion Transport
potassium voltage-gated channel, subfamily Q, member 2	KCNQ2	3785	Ion Transport
potassium voltage-gated channel, subfamily Q, member 3	KCNQ3	3786	Ion Transport
potassium voltage-gated channel, subfamily Q, member 4	KCNQ4	9132	Ion Transport
potassium voltage-gated channel, subfamily Q, member 5	KCNQ5	56479	Ion Transport
K+ voltage-gated channel, subfamily S, 1	KCNS1	3787	Ion Transport
K+ voltage-gated channel, subfamily S, 2	KCNS2	3788	Ion Transport
potassium voltage-gated channel, delayed-rectifier, subfamily S, member 3	KCNS3	3790	Ion Transport
potassium channel, subfamily T, member 1	KCNT1	57582	Ion Transport
potassium channel, subfamily T, member 2	KCNT2	343450	Ion Transport
potassium channel, subfamily U, member 1	KCNU1	157855	Ion Transport
potassium channel, subfamily V, member 1	KCNV1	27012	Ion Transport
potassium channel, subfamily V, member 2	KCNV2	169522	Ion Transport
potassium channel tetramerisation domain containing 1	KCTD1	284252	Ion Transport
potassium channel tetramerisation domain containing 10	KCTD10	83892	Ion Transport
potassium channel tetramerisation domain containing 11	KCTD11	147040	Ion Transport
potassium channel tetramerisation domain containing 12	KCTD12	115207	Ion Transport
potassium channel tetramerisation domain containing 13	KCTD13	253980	Ion Transport
potassium channel tetramerisation domain containing 14	KCTD14	65987	Ion Transport
potassium channel tetramerisation domain containing 15	KCTD15	79047	Ion Transport
potassium channel tetramerisation domain containing 16	KCTD16	57528	Ion Transport
potassium channel tetramerisation domain containing 17	KCTD17	79734	Ion Transport
potassium channel tetramerisation domain containing 18	KCTD18	130535	Ion Transport
potassium channel tetramerisation domain containing 19	KCTD19	146212	Ion Transport
potassium channel tetramerisation domain containing 2	KCTD2	23510	Ion Transport
potassium channel tetramerisation domain containing 20	KCTD20	222658	Ion Transport
potassium channel tetramerisation domain containing 21	KCTD21	283219	Ion Transport
potassium channel tetramerisation domain containing 3	KCTD3	51133	Ion Transport
potassium channel tetramerisation domain containing 4	KCTD4	386618	Ion Transport
potassium channel tetramerisation domain containing 5	KCTD5	54442	Ion Transport
potassium channel tetramerisation domain containing 6	KCTD6	200845	Ion Transport
potassium channel tetramerisation domain containing 7	KCTD7	154881	Ion Transport
potassium channel tetramerisation domain containing 8	KCTD8	386617	Ion Transport
potassium channel tetramerisation domain containing 9	KCTD9	54793	Ion Transport
purinergic receptor P2X, ligand-gated ion channel, 1	P2RX1	5023	Ion Transport
purinergic receptor P2X, ligand-gated ion channel, 2	P2RX2	22953	Ion Transport
purinergic receptor P2X, ligand-gated ion channel, 3	P2RX3	5024	Ion Transport
purinergic receptor P2X, ligand-gated ion channel, 4	P2RX4	5025	Ion Transport
purinergic receptor P2X, ligand-gated ion channel, 5	P2RX5	5026	Ion Transport
purinergic receptor P2X, ligand-gated ion channel, 6	P2RX6	9127	Ion Transport
purinergic receptor P2X, ligand-gated ion channel, 7	P2RX7	5027	Ion Transport
sodium channel, voltage-gated, type X, alpha	SCN10A	6336	Ion Transport
sodium channel, voltage-gated, type XI, alpha	SCN11A	11280	Ion Transport
sodium channel, voltage-gated, type I, alpha	SCN1A	6323	Ion Transport
sodium channel, voltage-gated, type I, beta	SCN1B	6324	Ion Transport
sodium channel, voltage-gated, type II, alpha 1	SCN2A	6326	Ion Transport
sodium channel, voltage-gated, type II, beta	SCN2B	6327	Ion Transport
sodium channel, voltage-gated, type III, alpha	SCN3A	6328	Ion Transport
sodium channel, voltage-gated, type III, beta	SCN3B	55800	Ion Transport
sodium channel, voltage-gated, type IV, alpha	SCN4A	6329	Ion Transport
sodium channel, voltage-gated, type IV, beta	SCN4B	6330	Ion Transport
sodium channel, voltage-gated, type V, alpha	SCN5A	6331	Ion Transport
sodium channel, voltage-gated, type VII, alpha	SCN7A	6332	Ion Transport
sodium channel, voltage-gated, type VIII, alpha	SCN8A	6334	Ion Transport
sodium channel, voltage-gated, type IX, alpha	SCN9A	6335	Ion Transport
sodium channel, nonvoltage-gated, type I, alpha	SCNN1A	6337	Ion Transport
sodium channel, nonvoltage-gated 1 beta	SCNN1B	6338	Ion Transport
sodium channel, nonvoltage-gated 1, delta	SCNN1D	6339	Ion Transport
sodium channel, nonvoltage-gated 1 gamma	SCNN1G	6340	Ion Transport
solute carrier family 11 (proton-coupled divalent metal ion transporters), member 1	SLC11A1	6556	Ion Transport
solute carrier family 11 (proton-coupled divalent metal ion transporters), member 2	SLC11A2	4891	Ion Transport
solute carrier family 12 (sodium/potassium/chloride transporters), member 1	SLC12A1	6557	Ion Transport
solute carrier family 12, member 2	SLC12A2	6558	Ion Transport
solute carrier family 12, member 3	SLC12A3	6559	Ion Transport
solute carrier family 12, member 4	SLC12A4	6560	Ion Transport
solute carrier family 12, member 5	SLC12A5	57468	Ion Transport
solute carrier family 12, member 6	SLC12A6	9990	Ion Transport
solute carrier family 12, member 7	SLC12A7	10723	Ion Transport
solute carrier family 12 (potassium/chloride transporters), member 8	SLC12A8	84561	Ion Transport
solute carrier family 12 (potassium/chloride transporters), member 9	SLC12A9	56996	Ion Transport
solute carrier family 13 (sodium/sulphate symporters), member 1	SLC13A1	6561	Ion Transport
solute carrier family 13 (sodium-dependent dicarboxylate transporter), member 2	SLC13A2	9058	Ion Transport
solute carrier family 13 (sodium-dependent dicarboxylate transporter), member 3	SLC13A3	64849	Ion Transport
solute carrier family 13 (sodium/sulfate symporters), member 4	SLC13A4	26266	Ion Transport
solute carrier family 13 (sodium/sulfate symporters), member 5	SLC13A5	284111	Ion Transport
solute carrier family 24 (sodium/potassium/calcium exchanger), member 1	SLC24A1	9187	Ion Transport
solute carrier family 24 (sodium/potassium/calcium exchanger), member 2	SLC24A2	25769	Ion Transport
solute carrier family 24 (sodium/potassium/calcium exchanger), member 3	SLC24A3	57419	Ion Transport
solute carrier family 24 (sodium/potassium/calcium exchanger), member 4	SLC24A4	123041	Ion Transport
solute carrier family 24, member 5	SLC24A5	283652	Ion Transport
solute carrier family 24 (sodium/potassium/calcium exchanger), member 6	SLC24A6	80024	Ion Transport
solute carrier family 30 (zinc transporter), member 1	SLC30A1	7779	Ion Transport
solute carrier family 30, member 10	SLC30A10	55532	Ion Transport
solute carrier family 30 (zinc transporter), member 2	SLC30A2	7780	Ion Transport
solute carrier family 30 (zinc transporter), member 3	SLC30A3	7781	Ion Transport
solute carrier family 30 (zinc transporter), member 4	SLC30A4	7782	Ion Transport
solute carrier family 30 (zinc transporter), member 5	SLC30A5	64924	Ion Transport
solute carrier family 30 (zinc transporter), member 6	SLC30A6	55676	Ion Transport
solute carrier family 30 (zinc transporter), member 7	SLC30A7	148867	Ion Transport
solute carrier family 30 (zinc transporter), member 8	SLC30A8	169026	Ion Transport
solute carrier family 30 (zinc transporter), member 9	SLC30A9	10463	Ion Transport
solute carrier family 39 (zinc transporter), member 1	SLC39A1	27173	Ion Transport
solute carrier family 39 (zinc transporter), member 10	SLC39A10	57181	Ion Transport
solute carrier family 39 (metal ion transporter), member 11	SLC39A11	201266	Ion Transport
solute carrier family 39 (metal ion transporter), member 12	SLC39A12	221074	Ion Transport
solute carrier family 39 (metal ion transporter), member 13	SLC39A13	91252	Ion Transport
solute carrier family 39 (zinc transporter), member 14	SLC39A14	23516	Ion Transport
solute carrier family 39 (zinc transporter), member 2	SLC39A2	29986	Ion Transport
solute carrier family 39 (zinc transporter), member 3	SLC39A3	29985	Ion Transport
solute carrier family 39 (zinc transporter), member 4	SLC39A4	55630	Ion Transport
solute carrier family 39 (metal ion transporter), member 5	SLC39A5	283375	Ion Transport
solute carrier family 39 (metal ion transporter), member 6	SLC39A6	25800	Ion Transport
solute carrier family 39, member 7	SLC39A7	7922	Ion Transport
solute carrier family 39 (metal ion transporter), member 8	SLC39A8	64116	Ion Transport
solute carrier family 39 (zinc transporter), member 9	SLC39A9	55334	Ion Transport
solute carrier family 3, member 1	SLC3A1	6519	Ion Transport
solute carrier family 3 (activators of dibasic and neutral amino acid transport), member 2	SLC3A2	6520	Ion Transport
solute carrier family 40 (iron-regulated transporter), member 1	SLC40A1	30061	Ion Transport
solute carrier family 41, member 1	SLC41A1	254428	Ion Transport
solute carrier family 41, member 2	SLC41A2	84102	Ion Transport
solute carrier family 41, member 3	SLC41A3	54946	Ion Transport
voltage-dependent anion channel 1	VDAC1	7416	Ion Transport
voltage-dependent anion channel 2	VDAC2	7417	Ion Transport
voltage-dependent anion channel 3	VDAC3	7419	Ion Transport
zinc activated ligand-gated ion channel	ZACN	353174	Ion Transport
hephaestin	HEPH	9843	Ion Transport
ligand-gated ion channel, zinc activated 1	LGICZ1	353174	Ion Transport
organic anion transporter LST-3b	LST-3TM12	338821	Ion Transport
magnesium transporter 1	MAGT1	84061	Ion Transport
Mucolipin 1	MCOLN1	57192	Ion Transport
Mucolipin 2	MCOLN2	255231	Ion Transport
Mucolipin 3	MCOLN3	55283	Ion Transport
methylmalonic aciduria (cobalamin deficiency) cblA type	MMAA	166785	Ion Transport
sodium leak channel, non-selective	NALCN	259232	Ion Transport
non imprinted in Prader-Willi/Angelman syndrome 1	NIPA1	123606	Ion Transport
Oculocutaneous albinism II (pink-eye dilution homolog, mouse)	OCA2	4948	Ion Transport
ORAI calcium release-activated calcium modulator 1	ORAI1	84876	Ion Transport
ORAI calcium release-activated calcium modulator 2	ORAI2	80228	Ion Transport
ORAI calcium release-activated calcium modulator 3	ORAI3	93129	Ion Transport
Polycystic kidney disease 1 (autosomal dominant)	PKD1	5310	Ion Transport
Polycystic kidney disease 2 (autosomal dominant)	PKD2	5311	Ion Transport
Polycystic kidney disease 2-like 1	PKD2L1	9033	Ion Transport
ryanodine receptor 1 (skeletal)	RYR1	6261	Ion Transport
ryanodine receptor 2 (cardiac)	RYR2	6262	Ion Transport
ryanodine receptor 3	RYR3	6263	Ion Transport
Solute carrier family 22, member 24	SLC22A24	283238	Ion Transport
Solute carrier family 22, member 25	SLC25A25	387601	Ion Transport
solute carrier family 31, member 1	SLC31A1	1317	Ion Transport
solute carrier family 31, member 2	SLC31A2	1318	Ion Transport
sarcolipin	SLN	6588	Ion Transport
transcobalamin I (vitamin B12 binding protein, R binder family)	TCN1	6947	Ion Transport
transcobalamin II; macrocytic anemia	TCN2	6948	Ion Transport
transferrin	TF	7018	Ion Transport
transient receptor potential cation channel, subfamily A, member 1	TRPA1	8989	Ion Transport
transient receptor potential cation channel, subfamily C, member 1	TRPC1	7220	Ion Transport
transient receptor potential cation channel, subfamily C, member 3	TRPC3	7222	Ion Transport
transient receptor potential cation channel, subfamily C, member 4	TRPC4	7223	Ion Transport
transient receptor potential cation channel, subfamily C, member 5	TRPC5	7224	Ion Transport
transient receptor potential cation channel, subfamily C, member 6	TRPC6	7225	Ion Transport
transient receptor potential cation channel, subfamily C, member 7	TRPC7	57113	Ion Transport
transient receptor potential cation channel, subfamily M, member 1	TRPM1	4308	Ion Transport
transient receptor potential cation channel, subfamily M, member 2	TRPM2	7226	Ion Transport
transient receptor potential cation channel, subfamily M, member 3	TRPM3	80036	Ion Transport
transient receptor potential cation channel, subfamily M, member 4	TRPM4	54795	Ion Transport
transient receptor potential cation channel, subfamily M, member 5	TRPM5	29850	Ion Transport
transient receptor potential cation channel, subfamily M, member 6	TRPM6	140803	Ion Transport
transient receptor potential cation channel, subfamily M, member 7	TRPM7	54822	Ion Transport
transient receptor potential cation channel, subfamily M, member 8	TRPM8	79054	Ion Transport
transient receptor potential cation channel, subfamily V, member 1	TRPV1	7442	Ion Transport
transient receptor potential cation channel, subfamily V, member 2	TRPV2	51393	Ion Transport
transient receptor potential cation channel, subfamily V, member 3	TRPV3	162514	Ion Transport
transient receptor potential cation channel, subfamily V, member 4	TRPV4	59341	Ion Transport
transient receptor potential cation channel, subfamily V, member 5	TRPV5	56302	Ion Transport
transient receptor potential cation channel, subfamily V, member 6	TRPV6	55503	Ion Transport
Tweety homolog 1 (Drosophila)	TTYH1	57348	Ion Transport
Tweety homolog 2 (Drosophila)	TTYH2	94015	Ion Transport
Tweety homolog 3 (Drosophila)	TTYH3	80727	Ion Transport
3-hydroxybutyrate dehydrogenase, type 1	BDH1	622	Ketone Bodies
3-hydroxybutyrate dehydrogenase, type 2	BDH2	56898	Ketone Bodies
3-oxoacid CoA transferase 1	OXCT1	5019	Ketone Bodies
3-oxoacid CoA transferase 2	OXCT2	64064	Ketone Bodies
ATP citrate lyase	ACLY	47	Krebs
aconitase 1, soluble	ACO1	48	Krebs
aconitase 2, mitochondrial	ACO2	50	Krebs
citrate synthase	CS	1431	Krebs
D-2-hydroxyglutarate dehydrogenase	D2HGDH	728294	Krebs
dihydrolipoamide S-succinyltransferase (E2 component of 2-oxo-glutarate complex)	DLST	1743	Krebs
fumarate hydratase	FH	2271	Krebs
holocytochrome c synthase (cytochrome c heme-lyase)	HCCS	3052	Krebs
isocitrate dehydrogenase 1 (NADP+), soluble	IDH1	3417	Krebs
isocitrate dehydrogenase 2 (NADP+), mitochondrial	IDH2	3418	Krebs
isocitrate dehydrogenase 3 (NAD+) alpha	IDH3A	3419	Krebs
isocitrate dehydrogenase 3 (NAD+) beta	IDH3B	3420	Krebs
isocitrate dehydrogenase 3 (NAD+) gamma	IDH3G	3421	Krebs
L-2-hydroxyglutarate dehydrogenase	L2HGDH	79944	Krebs
malate dehydrogenase 1, NAD (soluble)	MDH1	4190	Krebs
malate dehydrogenase 1B, NAD (soluble)	MDH1B	130752	Krebs
malate dehydrogenase 2, NAD (mitochondrial)	MDH2	4191	Krebs
malic enzyme 1, NADP(+)-dependent, cytosolic	ME1	4199	Krebs
malic enzyme 2, NAD(+)-dependent, mitochondrial	ME2	4200	Krebs
malic enzyme 3, NADP(+)-dependent, mitochondrial	ME3	10873	Krebs
oxoglutarate (alpha-ketoglutarate) dehydrogenase (lipoamide)	OGDH	4967	Krebs
oxoglutarate dehydrogenase-like	OGDHL	55753	Krebs
pyruvate carboxylase	PC	5091	Krebs
succinate-CoA ligase, ADP-forming, beta subunit	SUCLA2	8803	Krebs
succinate-CoA ligase, alpha subunit	SUCLG1	8802	Krebs
succinate-CoA ligase, GDP-forming, beta subunit	SUCLG2	8801	Krebs
aminoadipate-semialdehyde dehydrogenase	AASDH	132949	Lysine
aminoadipate-semialdehyde dehydrogenase-phosphopantetheinyl transferase	AASDHPPT	60496	Lysine
aminoadipate-semialdehyde synthase	AASS	10157	Lysine
pipecolic acid oxidase	PIPOX	51268	Lysine
1-acylglycerol-3-phosphate O-acyltransferase 1 (lysophosphatidic acid acyltransferase, alpha)	AGPAT1	10554	Membrane Lipid
1-acylglycerol-3-phosphate O-acyltransferase 2 (lysophosphatidic acid acyltransferase, beta)	AGPAT2	10555	Membrane Lipid
1-acylglycerol-3-phosphate O-acyltransferase 3	AGPAT3	56894	Membrane Lipid
1-acylglycerol-3-phosphate O-acyltransferase 4 (lysophosphatidic acid acyltransferase, delta)	AGPAT4	56895	Membrane Lipid
1-acylglycerol-3-phosphate O-acyltransferase 5 (lysophosphatidic acid acyltransferase, epsilon)	AGPAT5	55326	Membrane Lipid
1-acylglycerol-3-phosphate O-acyltransferase 6 (lysophosphatidic acid acyltransferase, zeta)	AGPAT6	137964	Membrane Lipid
1-acylglycerol-3-phosphate O-acyltransferase 9	AGPAT9	84803	Membrane Lipid
CDP-diacylglycerol synthase (phosphatidate cytidylyltransferase) 1	CDS1	1040	Membrane Lipid
CDP-diacylglycerol synthase (phosphatidate cytidylyltransferase) 2	CDS2	8760	Membrane Lipid
choline/ethanolamine phosphotransferase 1	CEPT1	10390	Membrane Lipid
choline kinase alpha	CHKA	1119	Membrane Lipid
choline kinase beta	CHKB	1120	Membrane Lipid
choline phosphotransferase 1	CHPT1	56994	Membrane Lipid
Charcot-Leyden crystal protein	CLC	1178	Membrane Lipid
cardiolipin synthase 1	CRLS1	54675	Membrane Lipid
carnitine O-octanoyltransferase	CROT	54677	Membrane Lipid
diacylglycerol lipase, alpha	DAGLA	747	Membrane Lipid
diacylglycerol lipase, beta	DAGLB	221955	Membrane Lipid
diacylglycerol kinase, alpha 80kDa	DGKA	1606	Membrane Lipid
diacylglycerol kinase, beta 90kDa	DGKB	1607	Membrane Lipid
diacylglycerol kinase, delta 130kDa	DGKD	8527	Membrane Lipid
diacylglycerol kinase, epsilon 64kDa	DGKE	8526	Membrane Lipid
diacylglycerol kinase, gamma 90kDa	DGKG	1608	Membrane Lipid
diacylglycerol kinase, eta	DGKH	160851	Membrane Lipid
diacylglycerol kinase, iota	DGKI	9162	Membrane Lipid
diacylglycerol kinase, kappa	DGKK	139189	Membrane Lipid
diacylglycerol kinase, theta 110kDa	DGKQ	1609	Membrane Lipid
diacylglycerol kinase, zeta 104kDa	DGKZ	8525	Membrane Lipid
ethanolamine kinase 1	ETNK1	55500	Membrane Lipid
ethanolamine kinase 2	ETNK2	55224	Membrane Lipid
glycerophosphodiester phosphodiesterase 1	GDE1	51573	Membrane Lipid
glycerol kinase	GK	2710	Membrane Lipid
glycerol kinase 2	GK2	2712	Membrane Lipid
glycerol kinase 5 (putative)	GK5	256356	Membrane Lipid
glyceronephosphate O-acyltransferase	GNPAT	8443	Membrane Lipid
glycerol-3-phosphate acyltransferase, mitochondrial	GPAM	57678	Membrane Lipid
glycerol-3-phosphate dehydrogenase 1 (soluble)	GPD1	2819	Membrane Lipid
glycerol-3-phosphate dehydrogenase 1-like	GPD1L	23171	Membrane Lipid
glycerol-3-phosphate dehydrogenase 2 (mitochondrial)	GPD2	2820	Membrane Lipid
lysophosphatidylcholine acyltransferase 1	LPCAT1	79888	Membrane Lipid
lysophosphatidylcholine acyltransferase 2	LPCAT2	54947	Membrane Lipid
membrane bound O-acyltransferase domain containing 5	LPCAT3	10162	Membrane Lipid
lysophosphatidylcholine acyltransferase 4	LPCAT4	254531	Membrane Lipid
lysophosphatidylglycerol acyltransferase 1	LPGAT1	9926	Membrane Lipid
lipin 1	LPIN1	23175	Membrane Lipid
lipin 2	LPIN2	9663	Membrane Lipid
lipin 3	LPIN3	64900	Membrane Lipid
lysophospholipase I	LYPLA1	10434	Membrane Lipid
lysophospholipase II	LYPLA2	11313	Membrane Lipid
lysophospholipase-like 1	LYPLAL1	127018	Membrane Lipid
membrane bound O-acyltransferase domain containing 1	MBOAT1	154141	Membrane Lipid
membrane bound O-acyltransferase domain containing 2	MBOAT2	129642	Membrane Lipid
membrane bound O-acyltransferase domain containing 4	MBOAT4	619373	Membrane Lipid
membrane bound O-acyltransferase domain containing 7	MBOAT7	79143	Membrane Lipid
monoacylglycerol O-acyltransferase 1	MOGAT1	116255	Membrane Lipid
monoacylglycerol O-acyltransferase 2	MOGAT2	80168	Membrane Lipid
monoacylglycerol O-acyltransferase 3	MOGAT3	346606	Membrane Lipid
N-acyl-phosphatidylethanolamine-hydrolyzing phospholipase D	NAPE-PLD	222236	Membrane Lipid
phosphatidic acid phosphatase type 2	PAP2D	163404	Membrane Lipid
phosphate cytidylyltransferase 1, choline, alpha	PCYT1A	5130	Membrane Lipid
phosphate cytidylyltransferase 1, choline, beta	PCYT1B	9468	Membrane Lipid
phosphate cytidylyltransferase 2, ethanolamine	PCYT2	5833	Membrane Lipid
phosphatidylethanolamine N-methyltransferase	PEMT	10400	Membrane Lipid
phosphatidylglycerophosphate synthase 1	PGS1	9489	Membrane Lipid
phosphatase orphan 1	PHOSPHO1	162466	Membrane Lipid
phosphatidylserine decarboxylase	PISD	23761	Membrane Lipid
phospholipase A1 member A	PLA1A	51365	Membrane Lipid
phospholipase A2, group X	PLA2G10	8399	Membrane Lipid
phospholipase A2, group XIIA	PLA2G12A	81579	Membrane Lipid
phospholipase A2, group XIIB	PLA2G12B	84647	Membrane Lipid
phospholipase A2, group XV	PLA2G15	23659	Membrane Lipid
phospholipase A2, group XVI	PLA2G16	11145	Membrane Lipid
phospholipase A2, group IB (pancreas)	PLA2G1B	5319	Membrane Lipid
phospholipase A2, group IIA (platelets, synovial fluid)	PLA2G2A	5320	Membrane Lipid
phospholipase A2, group IIC	PLA2G2C	391013	Membrane Lipid
phospholipase A2, group IID	PLA2G2D	26279	Membrane Lipid
phospholipase A2, group IIE	PLA2G2E	30814	Membrane Lipid
phospholipase A2, group IIF	PLA2G2F	64600	Membrane Lipid
phospholipase A2, group III	PLA2G3	50487	Membrane Lipid
phospholipase A2, group IVA (cytosolic, calcium-dependent)	PLA2G4A	5321	Membrane Lipid
phospholipase A2, group IVB (cytosolic)	PLA2G4B	100137049	Membrane Lipid
phospholipase A2, group IVC (cytosolic, calcium-independent)	PLA2G4C	8605	Membrane Lipid
phospholipase A2, group IVD (cytosolic)	PLA2G4D	283748	Membrane Lipid
phospholipase A2, group IVE	PLA2G4E	123745	Membrane Lipid
Phospholipase A2, group IVF	PLA2G4F	255189	Membrane Lipid
phospholipase A2, group V	PLA2G5	5322	Membrane Lipid
phospholipase A2, group VI (cytosolic, calcium-independent)	PLA2G6	8398	Membrane Lipid
phospholipase A2, group VII (platelet-activating factor acetylhydrolase, plasma)	PLA2G7	7941	Membrane Lipid
phospholipase B1	PLB1	151056	Membrane Lipid
phospholipase C, beta 1 (phosphoinositide-specific)	PLCB1	23236	Membrane Lipid
phospholipase C, beta 2	PLCB2	5330	Membrane Lipid
phospholipase C, beta 3 (phosphatidylinositol-specific)	PLCB3	5331	Membrane Lipid
phospholipase C, beta 4	PLCB4	5332	Membrane Lipid
phospholipase C, delta 1	PLCD1	5333	Membrane Lipid
phospholipase C, delta 3	PLCD3	113026	Membrane Lipid
phospholipase C, delta 4	PLCD4	84812	Membrane Lipid
Phospholipase C, epsilon 1	PLCE1	51196	Membrane Lipid
phospholipase C, gamma 1	PLCG1	5335	Membrane Lipid
Phospholipase C, gamma 2 (phosphatidylinositol-specific)	PLCG2	5336	Membrane Lipid
phospholipase C, eta 1	PLCH1	23007	Membrane Lipid
phospholipase C, eta 2	PLCH2	9651	Membrane Lipid
phospholipase C-like 1	PLCL1	5334	Membrane Lipid
phospholipase C-like 2	PLCL2	23228	Membrane Lipid
phosphatidylinositol-specific phospholipase C, X domain containing 1	PLCXD1	55344	Membrane Lipid
phosphatidylinositol-specific phospholipase C, X domain containing 2	PLCXD2	257068	Membrane Lipid
phosphatidylinositol-specific phospholipase C, X domain containing 3	PLCXD3	345557	Membrane Lipid
phospholipase C, zeta 1	PLCZ1	89869	Membrane Lipid
phospholipase D1, phosphatidylcholine-specific	PLD1	5337	Membrane Lipid
phospholipase D2	PLD2	5338	Membrane Lipid
phospholipase D family, member 3	PLD3	23646	Membrane Lipid
phospholipase D family, member 4	PLD4	122618	Membrane Lipid
phospholipase D family, member 5	PLD5	200150	Membrane Lipid
phospholipase D family, member 6	PLD6	201164	Membrane Lipid
phosphatidic acid phosphatase type 2A	PPAP2A	8611	Membrane Lipid
phosphatidic acid phosphatase type 2B	PPAP2B	8613	Membrane Lipid
phosphatidic acid phosphatase type 2C	PPAP2C	8612	Membrane Lipid
phosphatidic acid phosphatase type 2 domain containing 1A	PPAPDC1A	196051	Membrane Lipid
phosphatidic acid phosphatase type 2 domain containing 1B	PPAPDC1B	84513	Membrane Lipid
phosphatidic acid phosphatase type 2 domain containing 2	PPAPDC2	403313	Membrane Lipid
phosphatidic acid phosphatase type 2 domain containing 3	PPAPDC3	84814	Membrane Lipid
plasticity-related gene 2	PRG2	79948	Membrane Lipid
phosphatidylserine synthase 1	PTDSS1	9791	Membrane Lipid
phosphatidylserine synthase 2	PTDSS2	81490	Membrane Lipid
methionine adenosyltransferase I, alpha	MAT1A	4143	Methionine
methionine adenosyltransferase II, alpha	MAT2A	4144	Methionine
methionine adenosyltransferase II, beta	MAT2B	27430	Methionine
methionine sulfoxide reductase A	MSRA	4482	Methionine
methionine sulfoxide reductase B2	MSRB2	22921	Methionine
methionine sulfoxide reductase B3	MSRB3	253827	Methionine
5-methyltetrahydrofolate-homocysteine methyltransferase	MTR	4548	Methionine
selenoprotein X, 1	SEPX1	51734	Methionine
3-hydroxy-3-methylglutaryl-Coenzyme A reductase	HMGCR	3156	Mevalonate
3-hydroxy-3-methylglutaryl-Coenzyme A synthase 1 (soluble)	HMGCS1	3157	Mevalonate
3-hydroxy-3-methylglutaryl-Coenzyme A synthase 2 (mitochondrial)	HMGCS2	3158	Mevalonate
isopentenyl-diphosphate delta isomerase 1	IDI1	3422	Mevalonate
isopentenyl-diphosphate delta isomerase 2	IDI2	91734	Mevalonate
mevalonate (diphospho) decarboxylase	MVD	4597	Mevalonate
mevalonate kinase (mevalonic aciduria)	MVK	4598	Mevalonate
phosphomevalonate kinase	PMVK	10654	Mevalonate
abhydrolase domain containing 1	ABHD1	84696	Multipurpose
abhydrolase domain containing 10	ABHD10	55347	Multipurpose
abhydrolase domain containing 11	ABHD11	83451	Multipurpose
abhydrolase domain containing 12	ABHD12	26090	Multipurpose
abhydrolase domain containing 12B	ABHD12B	145447	Multipurpose
abhydrolase domain containing 13	ABHD13	84945	Multipurpose
abhydrolase domain containing 14A	ABHD14A	25864	Multipurpose
abhydrolase domain containing 14B	ABHD14B	84836	Multipurpose
abhydrolase domain containing 2	ABHD2	11057	Multipurpose
abhydrolase domain containing 3	ABHD3	171586	Multipurpose
abhydrolase domain containing 4	ABHD4	63874	Multipurpose
Abhydrolase domain containing 5	ABHD5	51099	Multipurpose
abhydrolase domain containing 6	ABHD6	57406	Multipurpose
abhydrolase domain containing 7	ABHD7	253152	Multipurpose
abhydrolase domain containing 8	ABHD8	79575	Multipurpose
abhydrolase domain containing 9	ABHD9	79852	Multipurpose
amiloride binding protein 1 (amine oxidase (copper-containing))	ABP1	26	Multipurpose
acylphosphatase 1, erythrocyte (common) type	ACYP1	97	Multipurpose
acylphosphatase 2, muscle type	ACYP2	98	Multipurpose
alcohol dehydrogenase 1A (class I), alpha polypeptide	ADH1A	124	Multipurpose
Alcohol dehydrogenase 1B (class I), beta polypeptide	ADH1B	125	Multipurpose
alcohol dehydrogenase 1C (class I), gamma polypeptide	ADH1C	126	Multipurpose
alcohol dehydrogenase 4 (class II), pi polypeptide	ADH4	127	Multipurpose
alcohol dehydrogenase 5 (class III), chi polypeptide	ADH5	128	Multipurpose
alcohol dehydrogenase 6 (class V)	ADH6	130	Multipurpose
alcohol dehydrogenase 7 (class IV), mu or sigma polypeptide	ADH7	131	Multipurpose
alcohol dehydrogenase, iron containing, 1	ADHFE1	137872	Multipurpose
Aldo-keto reductase family 1, member A1 (aldehyde reductase)	AKR1A1	10327	Multipurpose
aldo-keto reductase family 1, member B1 (aldose reductase)	AKR1B1	231	Multipurpose
aldo-keto reductase family 1, member B10 (aldose reductase)	AKR1B10	57016	Multipurpose
aldo-keto reductase family 1, member C1 (dihydrodiol dehydrogenase 1; 20-alpha (3-alpha)-hydroxysteroid dehydrogenase)	AKR1C1	1645	Multipurpose
Aldo-keto reductase family 1, member C2 (dihydrodiol dehydrogenase 2; bile acid binding protein; 3-alpha hydroxysteroid dehydrogenase, type III)	AKR1C2	1646	Multipurpose
aldo-keto reductase family 1, member C3 (3-alpha hydroxysteroid dehydrogenase, type II)	AKR1C3	8644	Multipurpose
aldo-keto reductase family 1, member C-like 2	AKR1CL2	83592	Multipurpose
aldo-keto reductase family 7, member A2 (aflatoxin aldehyde reductase)	AKR7A2	8574	Multipurpose
aldo-keto reductase family 7, member A3 (aflatoxin aldehyde reductase)	AKR7A3	22977	Multipurpose
aldehyde dehydrogenase 16 family, member A1	ALDH16A1	126133	Multipurpose
aldehyde dehydrogenase 1 family, member A1	ALDH1A1	216	Multipurpose
aldehyde dehydrogenase 1 family, member A2	ALDH1A2	8854	Multipurpose
aldehyde dehydrogenase 1 family, member A3	ALDH1A3	220	Multipurpose
aldehyde dehydrogenase 1 family, member B1	ALDH1B1	219	Multipurpose
aldehyde dehydrogenase 1 family, member L1	ALDH1L1	10840	Multipurpose
aldehyde dehydrogenase 1 family, member L2	ALDH1L2	160428	Multipurpose
aldehyde dehydrogenase 2 family (mitochondrial)	ALDH2	217	Multipurpose
aldehyde dehydrogenase 3 family, memberA1	ALDH3A1	218	Multipurpose
aldehyde dehydrogenase 3 family, member A2	ALDH3A2	224	Multipurpose
aldehyde dehydrogenase 3 family, member B1	ALDH3B1	221	Multipurpose
aldehyde dehydrogenase 3 family, member B2	ALDH3B2	222	Multipurpose
aldehyde dehydrogenase 6 family, member A1	ALDH6A1	4329	Multipurpose
aldehyde dehydrogenase 7 family, member A1	ALDH7A1	501	Multipurpose
aldehyde dehydrogenase 8 family, member A1	ALDH8A1	64577	Multipurpose
aldehyde dehydrogenase 9 family, member A1	ALDH9A1	223	Multipurpose
amine oxidase, copper containing 2 (retina-specific)	AOC2	314	Multipurpose
amine oxidase, copper containing 3 (vascular adhesion protein 1)	AOC3	8639	Multipurpose
Arylsulfatase A	ARSA	410	Multipurpose
arylsulfatase B	ARSB	411	Multipurpose
arylsulfatase D	ARSD	414	Multipurpose
arylsulfatase E (chondrodysplasia punctata 1)	ARSE	415	Multipurpose
arylsulfatase F	ARSF	416	Multipurpose
arylsulfatase G	ARSG	22901	Multipurpose
arylsulfatase H	ARSH	347527	Multipurpose
arylsulfatase family, member I	ARSI	340075	Multipurpose
arylsulfatase family, member J	ARSJ	79642	Multipurpose
Arylsulfatase family, member K	ARSK	153642	Multipurpose
AU RNA binding protein/enoyl-Coenzyme A hydratase	AUH	549	Multipurpose
carbonic anhydrase I	CA1	759	Multipurpose
carbonic anhydrase X	CA10	56934	Multipurpose
carbonic anhydrase XI	CA11	770	Multipurpose
carbonic anhydrase XII	CA12	771	Multipurpose
carbonic anhydrase XIII	CA13	377677	Multipurpose
carbonic anhydrase XIV	CA14	23632	Multipurpose
carbonic anhydrase II	CA2	760	Multipurpose
carbonic anhydrase III, muscle specific	CA3	761	Multipurpose
carbonic anhydrase IV	CA4	762	Multipurpose
carbonic anhydrase VA, mitochondrial	CA5A	763	Multipurpose
carbonic anhydrase VB, mitochondrial	CA5B	11238	Multipurpose
carbonic anhydrase VI	CA6	765	Multipurpose
carbonic anhydrase VII	CA7	766	Multipurpose
carbonic anhydrase VIII	CA8	767	Multipurpose
carbonic anhydrase IX	CA9	768	Multipurpose
carbonyl reductase 1	CBR1	873	Multipurpose
carbonyl reductase 3	CBR3	874	Multipurpose
carbonyl reductase 4	CBR4	84869	Multipurpose
dihydrolipoamide dehydrogenase	DLD	1738	Multipurpose
gamma-glutamyl hydrolase (conjugase, folylpolygammaglutamyl hydrolase)	GGH	8836	Multipurpose
gamma-glutamyltransferase 1	GGT1	2678	Multipurpose
gamma-glutamyltransferase 2	GGT2	728441	Multipurpose
gamma-glutamyltransferase 5	GGT5	2687	Multipurpose
gamma-glutamyltransferase 6 homolog (rat)	GGT6	124975	Multipurpose
gamma-glutamyltransferase 7	GGT7	2686	Multipurpose
gamma-glutamyltransferase-like activity 4	GGTLC1	92086	Multipurpose
gamma-glutamyltransferase light chain 2	GGTLC2	91227	Multipurpose
glutamic-oxaloacetic transaminase 1, soluble (aspartate aminotransferase 1)	GOT1	2805	Multipurpose
glutamic-oxaloacetic transaminase 1-like 1	GOT1L1	137362	Multipurpose
glutamic-oxaloacetic transaminase 2, mitochondrial (aspartate aminotransferase 2)	GOT2	2806	Multipurpose
glutathione transferase zeta 1 (maleylacetoacetate isomerase)	GSTZ1	2954	Multipurpose
3-hydroxymethyl-3-methylglutaryl-Coenzyme A lyase (hydroxymethylglutaricaciduria)	HMGCL	3155	Multipurpose
3-hydroxymethyl-3-methylglutaryl-Coenzyme A lyase-like 1	HMGCLL1	54511	Multipurpose
plasticity related gene 1	LPPR4	9890	Multipurpose
MAK10 homolog, amino-acid N-acetyltransferase subunit (S. cerevisiae)	MAK10	60560	Multipurpose
monoamine oxidase A	MAOA	4128	Multipurpose
Monoamine oxidase B	MAOB	4129	Multipurpose
N-acetyltransferase 1 (arylamine N-acetyltransferase)	NAT1	9	Multipurpose
N-acetyltransferase 10	NAT10	55226	Multipurpose
N-acetyltransferase 11	NAT11	79829	Multipurpose
N-acetyltransferase 12	NAT12	122830	Multipurpose
N-acetyltransferase 13	NAT13	80218	Multipurpose
N-acetyltransferase 14	NAT14	57106	Multipurpose
N-acetyltransferase 15	NAT15	79903	Multipurpose
N-acetyltransferase 2 (arylamine N-acetyltransferase)	NAT2	10	Multipurpose
N-acetyltransferase 5	NAT5	51126	Multipurpose
N-acetyltransferase 6	NAT6	24142	Multipurpose
N-acetyltransferase 8	NAT8	9027	Multipurpose
N-acetyltransferase 8B	NAT8B	51471	Multipurpose
N-acetyltransferase 8-like	NAT8L	339983	Multipurpose
N-acetyltransferase 9	NAT9	26151	Multipurpose
P450 (cytochrome) oxidoreductase	POR	5447	Multipurpose
zinc binding alcohol dehydrogenase, domain containing 2	ZADH2	284273	Multipurpose
bone marrow stromal cell antigen 1	BST1	683	NAD
Chromosome 9 ORF 95	C9ORF95	54981	NAD
dual oxidase 1	DUOX1	53905	NAD
dual oxidase 2	DUOX2	50506	NAD
NAD kinase	NADK	65220	NAD
NAD synthetase 1	NADSYN1	55191	NAD
nicotinate phosphoribosyltransferase domain containing 1	NAPRT1	93100	NAD
nicotinamide nucleotide adenylyltransferase 1	NMNAT1	64802	NAD
nicotinamide nucleotide adenylyltransferase 2	NMNAT2	23057	NAD
nicotinamide nucleotide adenylyltransferase 3	NMNAT3	349565	NAD
nicotinamide N-methyltransferase	NNMT	4837	NAD
nicotinamide nucleotide transhydrogenase	NNT	23530	NAD
NADPH oxidase 1	NOX1	27035	NAD
NADPH oxidase 3	NOX3	50508	NAD
NADPH oxidase 4	NOX4	50507	NAD
NADPH oxidase, EF-hand calcium binding domain 5	NOX5	79400	NAD
NAD(P)H dehydrogenase, quinone 1	NQO1	1728	NAD
NAD(P)H dehydrogenase, quinone 2	NQO2	4835	NAD
quinolinate phosphoribosyltransferase (nicotinate-nucleotide pyrophosphorylase (carboxylating))	QPRT	23475	NAD
4-aminobutyrate aminotransferase	ABAT	18	Neurotransmitter
acetylcholinesterase (Yt blood group)	ACHE	43	Neurotransmitter
choline acetyltransferase	CHAT	1103	Neurotransmitter
choline dehydrogenase	CHDH	55349	Neurotransmitter
catechol-O-methyltransferase	COMT	1312	Neurotransmitter
catechol-O-methyltransferase domain containing 1	COMTD1	118881	Neurotransmitter
dopamine beta-hydroxylase (dopamine beta-monooxygenase)	DBH	1621	Neurotransmitter
dopa decarboxylase (aromatic L-amino acid decarboxylase)	DDC	1644	Neurotransmitter
N-acetylated alpha-linked acidic dipeptidase 2	NAALAD2	10003	Neurotransmitter
N-acetylated alpha-linked acidic dipeptidase-like 1	NAALADL1	10004	Neurotransmitter
N-acetylated alpha-linked acidic dipeptidase-like 2	NAALADL2	254827	Neurotransmitter
phenylethanolamine N-methyltransferase	PNMT	5409	Neurotransmitter
serine racemase	SRR	63826	Neurotransmitter
tyrosine hydroxylase	TH	7054	Neurotransmitter
tryptophan hydroxylase 1 (tryptophan 5-monooxygenase)	TPH1	7166	Neurotransmitter
tryptophan hydroxylase 2	TPH2	121278	Neurotransmitter
3'(2'), 5'-bisphosphate nucleotidase 1	BPNT1	10380	Nucleotide
calcium activated nucleotidase 1	CANT1	124583	Nucleotide
deoxycytidine kinase	DCK	1633	Nucleotide
ectonucleotide pyrophosphatase/phosphodiesterase 1	ENPP1	5167	Nucleotide
ectonucleotide pyrophosphatase/phosphodiesterase 2 (autotaxin)	ENPP2	5168	Nucleotide
ectonucleotide pyrophosphatase/phosphodiesterase 3	ENPP3	5169	Nucleotide
ectonucleotide pyrophosphatase/phosphodiesterase 4 (putative function)	ENPP4	22875	Nucleotide
ectonucleotide pyrophosphatase/phosphodiesterase 5 (putative function)	ENPP5	59084	Nucleotide
ectonucleotide pyrophosphatase/phosphodiesterase 6	ENPP6	133121	Nucleotide
ectonucleotide pyrophosphatase/phosphodiesterase 7	ENPP7	339221	Nucleotide
ectonucleoside triphosphate diphosphohydrolase 1	ENTPD1	953	Nucleotide
ectonucleoside triphosphate diphosphohydrolase 2	ENTPD2	954	Nucleotide
ectonucleoside triphosphate diphosphohydrolase 3	ENTPD3	956	Nucleotide
ectonucleoside triphosphate diphosphohydrolase 4	ENTPD4	9583	Nucleotide
ectonucleoside triphosphate diphosphohydrolase 5	ENTPD5	957	Nucleotide
ectonucleoside triphosphate diphosphohydrolase 6 (putative function)	ENTPD6	955	Nucleotide
ectonucleoside triphosphate diphosphohydrolase 7	ENTPD7	57089	Nucleotide
ectonucleoside triphosphate diphosphohydrolase 8	ENTPD8	377841	Nucleotide
inosine triphosphatase (nucleoside triphosphate pyrophosphatase)	ITPA	3704	Nucleotide
non-metastatic cells 1, protein (NM23A) expressed in	NME1	4830	Nucleotide
non-metastatic cells 2, protein (NM23A) expressed in	NME2	4831	Nucleotide
non-metastatic cells 3, protein expressed in	NME3	4832	Nucleotide
non-metastatic cells 4, protein expressed in	NME4	4833	Nucleotide
non-metastatic cells 5, protein expressed in (nucleoside-diphosphate kinase)	NME5	8382	Nucleotide
non-metastatic cells 6, protein expressed in (nucleoside-diphosphate kinase)	NME6	10201	Nucleotide
non-metastatic cells 7, protein expressed in (nucleoside-diphosphate kinase)	NME7	29922	Nucleotide
5', 3'-nucleotidase, cytosolic	NT5C	30833	Nucleotide
5'-nucleotidase, cytosolic IA	NT5C1A	84618	Nucleotide
5'-nucleotidase, cytosolic IB	NT5C1B	93034	Nucleotide
5'-nucleotidase, cytosolic II	NT5C2	22978	Nucleotide
5'-nucleotidase, cytosolic III	NT5C3	51251	Nucleotide
5'-nucleotidase, cytosolic III-like	NT5C3L	115024	Nucleotide
5'-nucleotidase domain containing 1	NT5DC1	221294	Nucleotide
5'-nucleotidase domain containing 2	NT5DC2	64943	Nucleotide
5'-nucleotidase domain containing 3	NT5DC3	51559	Nucleotide
5'-nucleotidase domain containing 4	NT5DC4	284958	Nucleotide
5'-nucleotidase, ecto (CD73)	NT5E	4907	Nucleotide
5',3'-nucleotidase, mitochondrial	NT5M	56953	Nucleotide
nudix (nucleoside diphosphate linked moiety X)-type motif 1	NUDT1	4521	Nucleotide
nudix (nucleoside diphosphate linked moiety X)-type motif 10	NUDT10	170685	Nucleotide
nudix (nucleoside diphosphate linked moiety X)-type motif 11	NUDT11	55190	Nucleotide
nudix (nucleoside diphosphate linked moiety X)-type motif 12	NUDT12	83594	Nucleotide
nudix (nucleoside diphosphate linked moiety X)-type motif 13	NUDT13	25961	Nucleotide
Nudix (nucleoside diphosphate linked moiety X)-type motif 14	NUDT14	256281	Nucleotide
nudix (nucleoside diphosphate linked moiety X)-type motif 15	NUDT15	55270	Nucleotide
nudix (nucleoside diphosphate linked moiety X)-type motif 16	NUDT16	131870	Nucleotide
nudix (nucleoside diphosphate linked moiety X)-type motif 16-like 1	NUDT16L1	84309	Nucleotide
nudix (nucleoside diphosphate linked moiety X)-type motif 17	NUDT17	200035	Nucleotide
nudix (nucleoside diphosphate linked moiety X)-type motif 18	NUDT18	79873	Nucleotide
nudix (nucleoside diphosphate linked moiety X)-type motif 19	NUDT19	390916	Nucleotide
nudix (nucleoside diphosphate linked moiety X)-type motif 2	NUDT2	318	Nucleotide
nudix (nucleoside diphosphate linked moiety X)-type motif 21	NUDT21	11051	Nucleotide
Nudix (nucleoside diphosphate linked moiety X)-type motif 22	NUDT22	84304	Nucleotide
nudix (nucleoside diphosphate linked moiety X)-type motif 3	NUDT3	11165	Nucleotide
nudix (nucleoside diphosphate linked moiety X)-type motif 4	NUDT4	11163	Nucleotide
nudix (nucleoside diphosphate linked moiety X)-type motif 5	NUDT5	11164	Nucleotide
nudix (nucleoside diphosphate linked moiety X)-type motif 6	NUDT6	11162	Nucleotide
nudix (nucleoside diphosphate linked moiety X)-type motif 7	NUDT7	283927	Nucleotide
nudix (nucleoside diphosphate linked moiety X)-type motif 8	NUDT8	254552	Nucleotide
nudix (nucleoside diphosphate linked moiety X)-type motif 9	NUDT9	53343	Nucleotide
ribonucleotide reductase M1 polypeptide	RRM1	6240	Nucleotide
ribonucleotide reductase M2 polypeptide	RRM2	6241	Nucleotide
ribonucleotide reductase M2 B (TP53 inducible)	RRM2B	50484	Nucleotide
TDP-glucose 4,6-dehydratase	TGDS	23483	Nucleotide Sugar
UDP-glucose dehydrogenase	UGDH	7358	Nucleotide Sugar
UDP-glucuronate decarboxylase 1	UXS1	80146	Nucleotide Sugar
APOBEC1 complementation factor	A1CF	29974	Other
ACN9 homolog (S. cerevisiae)	ACN9	57001	Other
acyloxyacyl hydrolase (neutrophil)	AOAH	313	Other
N-acylaminoacyl-peptide hydrolase	APEH	327	Other
arsenic (+3 oxidation state) methyltransferase	AS3MT	57412	Other
biphenyl hydrolase-like (serine hydrolase; breast epithelial mucin-associated antigen)	BPHL	670	Other
carboxymethylenebutenolidase homolog (Pseudomonas)	CMBL	134147	Other
carnosine dipeptidase 1 (metallopeptidase M20 family)	CNDP1	84735	Other
CNDP dipeptidase 2 (metallopeptidase M20 family)	CNDP2	55748	Other
DDHD domain containing 1	DDHD1	80821	Other
DDHD domain containing 2	DDHD2	23259	Other
enolase-phosphatase 1	ENOPH1	58478	Other
enolase superfamily member 1	ENOSF1	55556	Other
eosinophil peroxidase	EPX	8288	Other
esterase D/formylglutathione hydrolase	ESD	2098	Other
frataxin	FXN	2395	Other
glycerophosphodiester phosphodiesterase domain containing 1	GDPD1	284161	Other
glycerophosphodiester phosphodiesterase domain containing 2	GDPD2	54857	Other
glycerophosphodiester phosphodiesterase domain containing 3	GDPD3	79153	Other
glycerophosphodiester phosphodiesterase domain containing 4	GDPD4	220032	Other
glycerophosphodiester phosphodiesterase domain containing 5	GDPD5	81544	Other
glycine-N-acyltransferase	GLYAT	10249	Other
glycine-N-acyltransferase-like 1	GLYATL1	92292	Other
glycine-N-acyltransferase-like 2	GLYATL2	219970	Other
glycine N-methyltransferase	GNMT	27232	Other
histidine acid phosphatase domain containing 1	HISPPD1	23262	Other
histidine acid phosphatase domain containing 2A	HISPPD2A	9677	Other
isoamyl acetate-hydrolyzing esterase 1 homolog (S. cerevisiae)	IAH1	285148	Other
lipoic acid synthetase	LIAS	11019	Other
lipoyltransferase 1	LIPT1	51601	Other
MOCO sulphurase C-terminal domain containing 1	MOSC1	64757	Other
MOCO sulphurase C-terminal domain containing 2	MOSC2	54996	Other
myeloperoxidase	MPO	4353	Other
nitrilase 1	NIT1	4817	Other
nitrilase family, member 2	NIT2	56954	Other
peptidylglycine alpha-amidating monooxygenase	PAM	5066	Other
paraoxonase 1	PON1	5444	Other
paraoxonase 2	PON2	5445	Other
paraoxonase 3	PON3	5446	Other
pyrophosphatase (inorganic) 1	PPA1	5464	Other
pyrophosphatase (inorganic) 2	PPA2	27068	Other
phosphotriesterase related	PTER	9317	Other
thioesterase superfamily member 2	THEM2	55856	Other
thioesterase superfamily member 4	THEM4	117145	Other
thioesterase superfamily member 5	THEM5	284486	Other
UEV and lactate/malate dehyrogenase domains	UEVLD	55293	Other
WW domain containing oxidoreductase	WWOX	51741	Other
glycolipid transfer protein	GLTP	51228	Other
Cystinosis, nephropathic	CTNS	1497	Other Transport
Disrupted in renal carcinoma 2	DIRC2	84925	Other Transport
Feline leukemia virus subgroup C cellular receptor 1	FLVCR1	28982	Other Transport
Feline leukemia virus subgroup C cellular receptor family, member 2	FLVCR2	55640	Other Transport
Mitochondrial carrier triple repeat 1	MCART1	92014	Other Transport
Mitochondrial carrier triple repeat 2	MCART2	147407	Other Transport
Mitochondrial carrier triple repeat 6	MCART6	401612	Other Transport
Major Facilitator Superfamily Domain Containing 1	MFSD1	64747	Other Transport
Major Facilitator Superfamily Domain Containing 10	MFSD10	10227	Other Transport
Major Facilitator Superfamily Domain Containing 11	MFSD11	79157	Other Transport
Major Facilitator Superfamily Domain Containing 2	MFSD2	84879	Other Transport
Major Facilitator Superfamily Domain Containing 3	MFSD3	113655	Other Transport
Major Facilitator Superfamily Domain Containing 4	MFSD4	148808	Other Transport
Major Facilitator Superfamily Domain Containing 5	MFSD5	84975	Other Transport
Major Facilitator Superfamily Domain Containing 7	MFSD7	84179	Other Transport
Major Facilitator Superfamily Domain Containing 8	MFSD8	256471	Other Transport
Major Facilitator Superfamily Domain Containing 9	MFSD9	84804	Other Transport
organic solute transporter alpha	OSTalpha	200931	Other Transport
organic solute transporter beta	OSTbeta	123264	Other Transport
stimulated by retinoic acid gene 6 homolog (mouse)	STRA6	64220	Other Transport
transporter 1, ATP-binding cassette, sub-family B (MDR/TAP)	TAP1	6890	Other Transport
transporter 2, ATP-binding cassette, sub-family B (MDR/TAP)	TAP2	6891	Other Transport
Transmembrane and coiled-coil domains 3	TMCO3	55002	Other Transport
Transmembrane protein 104	TMEM104	54868	Other Transport
two pore segment channel 1	TPCN1	53373	Other Transport
Two pore segment channel 2	TPCN2	219931	Other Transport
2-deoxyribose-5-phosphate aldolase homolog (C. elegans)	DERA	51071	Pentose Phosphate
glucose-6-phosphate dehydrogenase	G6PD	2539	Pentose Phosphate
phosphogluconate dehydrogenase	PGD	5226	Pentose Phosphate
6-phosphogluconolactonase	PGLS	25796	Pentose Phosphate
ribulose-5-phosphate-3-epimerase	RPE	6120	Pentose Phosphate
ribose 5-phosphate isomerase A (ribose 5-phosphate epimerase)	RPIA	22934	Pentose Phosphate
transaldolase 1	TALDO1	6888	Pentose Phosphate
transketolase (Wernicke-Korsakoff syndrome)	TKT	7086	Pentose Phosphate
transketolase-like 1	TKTL1	8277	Pentose Phosphate
transketolase-like 2	TKTL2	84076	Pentose Phosphate
dopachrome tautomerase (dopachrome delta-isomerase, tyrosine-related protein 2)	DCT	1638	Pigment
D-dopachrome tautomerase	DDT	1652	Pigment
tyrosinase (oculocutaneous albinism IA)	TYR	7299	Pigment
tyrosinase-related protein 1	TYRP1	7306	Pigment
alpha-methylacyl-CoA racemase	AMACR	23600	Polyamine
adenosylmethionine decarboxylase 1	AMD1	262	Polyamine
methylthioadenosine phosphorylase	MTAP	4507	Polyamine
ornithine decarboxylase 1	ODC1	4953	Polyamine
polyamine oxidase (exo-N4-amino)	PAOX	196743	Polyamine
spermidine/spermine N1-acetyltransferase 1	SAT1	6303	Polyamine
spermidine/spermine N1-acetyltransferase family member 2	SAT2	112483	Polyamine
spermidine/spermine N1-acetyl transferase-like 1	SATL1	340562	Polyamine
spermine oxidase	SMOX	54498	Polyamine
spermine synthase	SMS	6611	Polyamine
spermidine synthase	SRM	6723	Polyamine
aminolevulinate, delta-, dehydratase	ALAD	210	Porphyrin
aminolevulinate, delta-, synthase 1	ALAS1	211	Porphyrin
aminolevulinate, delta-, synthase 2 (sideroblastic/hypochromic anemia)	ALAS2	212	Porphyrin
Biliverdin reductase A	BLVRA	644	Porphyrin
biliverdin reductase B (flavin reductase (NADPH))	BLVRB	645	Porphyrin
coproporphyrinogen oxidase	CPOX	1371	Porphyrin
ferrochelatase (protoporphyria)	FECH	2235	Porphyrin
hydroxymethylbilane synthase	HMBS	3145	Porphyrin
heme oxygenase (decycling) 1	HMOX1	3162	Porphyrin
heme oxygenase (decycling) 2	HMOX2	3163	Porphyrin
protoporphyrinogen oxidase	PPOX	5498	Porphyrin
uroporphyrinogen decarboxylase	UROD	7389	Porphyrin
uroporphyrinogen III synthase (congenital erythropoietic porphyria)	UROS	7390	Porphyrin
aldehyde dehydrogenase 4 family, member A1	ALDH4A1	8659	Proline
proline dehydrogenase (oxidase) 1	PRODH	5625	Proline
proline dehydrogenase (oxidase) 2	PRODH2	58510	Proline
pyrroline-5-carboxylate reductase 1	PYCR1	5831	Proline
pyrroline-5-carboxylate reductase family, member 2	PYCR2	29920	Proline
pyrroline-5-carboxylate reductase-like	PYCRL	65263	Proline
methylmalonyl CoA epimerase	MCEE	84693	Propanoate
methylmalonyl Coenzyme A mutase	MUT	4594	Propanoate
propionyl Coenzyme A carboxylase, alpha polypeptide	PCCA	5095	Propanoate
Propionyl Coenzyme A carboxylase, beta polypeptide	PCCB	5096	Propanoate
ATP synthase, H+ transporting, mitochondrial F1 complex, alpha subunit, isoform 1	ATP5A1	498	Proton Transport
ATP synthase, H+ transporting mitochondrial F1 complex, beta subunit	ATP5B	506	Proton Transport
ATP synthase, H+ transporting, mitochondrial F1 complex, gamma polypeptide 1	ATP5C1	509	Proton Transport
ATP synthase, H+ transporting, mitochondrial F1 complex, gamma polypeptide 2	ATP5C2	56689	Proton Transport
ATP synthase, H+ transporting, mitochondrial F1 complex, delta subunit	ATP5D	513	Proton Transport
ATP synthase, H+ transporting, mitochondrial F1 complex, epsilon subunit	ATP5E	514	Proton Transport
ATP synthase, H+ transporting, mitochondrial F0 complex, subunit b, isoform 1	ATP5F1	515	Proton Transport
ATP synthase, H+ transporting, mitochondrial F0 complex, subunit c (subunit 9), isoform 1	ATP5G1	516	Proton Transport
ATP synthase, H+ transporting, mitochondrial F0 complex, subunit c (subunit 9), isoform 2	ATP5G2	517	Proton Transport
ATP synthase, H+ transporting, mitochondrial F0 complex, subunit c (subunit 9), isoform 3	ATP5G3	518	Proton Transport
ATP synthase, H+ transporting, mitochondrial F0 complex, subunit d	ATP5H	10476	Proton Transport
ATP synthase, H+ transporting, mitochondrial F0 complex, subunit E	ATP5I	521	Proton Transport
ATP synthase, H+ transporting, mitochondrial F0 complex, subunit F	ATP5J	522	Proton Transport
ATP synthase, H+ transporting, mitochondrial F0 complex, subunit f, isoform 2	ATP5J2	9551	Proton Transport
ATP synthase, H+ transporting, mitochondrial F0 complex, subunit g	ATP5L	10632	Proton Transport
ATP synthase, H+ transporting, mitochondrial F0 complex, subunit G2	ATP5L2	267020	Proton Transport
ATP synthase, H+ transporting, mitochondrial F1 complex, O subunit	ATP5O	539	Proton Transport
ATP synthase, H+ transporting, mitochondrial F0 complex, subunit s	ATP5S	27109	Proton Transport
ATP5S-like	ATP5SL	55101	Proton Transport
mitochondrially encoded ATP synthase 6	ATP6	4508	Proton Transport
ATPase, H+ transporting, lysosomal accessory protein 1	ATP6AP1	537	Proton Transport
ATPase, H+ transporting, lysosomal accessory protein 2	ATP6AP2	10159	Proton Transport
ATPase, H+ transporting, lysosomal V0 subunit A1	ATP6V0A1	535	Proton Transport
ATPase, H+ transporting, lysosomal V0 subunit A2	ATP6V0A2	23545	Proton Transport
ATPase, H+ transporting, lysosomal V0 subunit A4	ATP6V0A4	50617	Proton Transport
ATPase, H+ transporting, lysosomal V0 subunit B	ATP6V0B	533	Proton Transport
ATPase, H+ transporting, lysosomal V0 subunit C	ATP6V0C	527	Proton Transport
ATPase, H+ transporting, lysosomal V0 subunit D1	ATP6V0D1	9114	Proton Transport
ATPase, H+ transporting, lysosomal V0 subunit D2	ATP6V0D2	245972	Proton Transport
ATPase, H+ transporting, lysosomal V0 subunit E	ATP6V0E1	8992	Proton Transport
ATPase, H+ transporting, lysosomal V0 subunit E2	ATP6V0E2	155066	Proton Transport
ATPase, H+ transporting, lysosomal V1 subunit A	ATP6V1A	523	Proton Transport
ATPase, H+ transporting, lysosomal V1 subunit B1	ATP6V1B1	525	Proton Transport
ATPase, H+ transporting, lysosomal V1 subunit B2	ATP6V1B2	526	Proton Transport
ATPase, H+ transporting, lysosomal V1 subunit C1	ATP6V1C1	528	Proton Transport
ATPase, H+ transporting, lysosomal V1 subunit C2	ATP6V1C2	245973	Proton Transport
ATPase, H+ transporting, lysosomal V1 subunit D	ATP6V1D	51382	Proton Transport
ATPase, H+ transporting, lysosomal V1 subunit E1	ATP6V1E1	529	Proton Transport
ATPase, H+ transporting, lysosomal V1 subunit E2	ATP6V1E2	90423	Proton Transport
ATPase, H+ transporting, lysosomal V1 subunit F	ATP6V1F	9296	Proton Transport
ATPase, H+ transporting, lysosomal V1 subunit G1	ATP6V1G1	9550	Proton Transport
ATPase, H+ transporting, lysosomal V1 subunit G2	ATP6V1G2	534	Proton Transport
ATPase, H+ transporting, lysosomal V1 subunit G3	ATP6V1G3	127124	Proton Transport
ATPase, H+ transporting, lysosomal V1 subunit H	ATP6V1H	51606	Proton Transport
hydrogen voltage-gated channel 1	HVCN1	84329	Proton Transport
T-cell, immune regulator 1, ATPase, H+ transporting, lysosomal V0 subunit A3	TCIRG1	10312	Proton Transport
uncoupling protein 1 (mitochondrial, proton carrier)	UCP1	7350	Proton Transport
uncoupling protein 2 (mitochondrial, proton carrier)	UCP2	7351	Proton Transport
uncoupling protein 3 (mitochondrial, proton carrier)	UCP3	7352	Proton Transport
adenosine deaminase	ADA	100	Purine
Adenosine deaminase domain containing 1 (testis-specific)	ADAD1	132612	Purine
adenosine deaminase domain containing 2	ADAD2	161931	Purine
adenosine deaminase-like	ADAL	161823	Purine
adenosine kinase	ADK	132	Purine
adenylosuccinate lyase	ADSL	158	Purine
Adenylosuccinate synthase	ADSS	159	Purine
adenylosuccinate synthase like 1	ADSSL1	122622	Purine
adenylate kinase 1	AK1	203	Purine
adenylate kinase 2	AK2	204	Purine
adenylate kinase 3	AK3	50808	Purine
adenylate kinase 3-like 1	AK3L1	205	Purine
adenylate kinase 5	AK5	26289	Purine
adenylate kinase 7	AK7	122481	Purine
adenosine monophosphate deaminase 1 (isoform M)	AMPD1	270	Purine
adenosine monophosphate deaminase 2 (isoform L)	AMPD2	271	Purine
adenosine monophosphate deaminase (isoform E)	AMPD3	272	Purine
adenine phosphoribosyltransferase	APRT	353	Purine
5-aminoimidazole-4-carboxamide ribonucleotide formyltransferase/IMP cyclohydrolase	ATIC	471	Purine
cat eye syndrome chromosome region, candidate 1	CECR1	51816	Purine
deoxyguanosine kinase	DGUOK	1716	Purine
Fragile histidine triad gene	FHIT	2272	Purine
phosphoribosylglycinamide formyltransferase, phosphoribosylglycinamide synthetase, phosphoribosylaminoimidazole synthetase	GART	2618	Purine
guanine deaminase	GDA	9615	Purine
guanosine monophosphate reductase	GMPR	2766	Purine
guanosine monophosphate reductase 2	GMPR2	51292	Purine
guanine monphosphate synthetase	GMPS	8833	Purine
guanylate kinase 1	GUK1	2987	Purine
Hypoxanthine phosphoribosyltransferase 1 (Lesch-Nyhan syndrome)	HPRT1	3251	Purine
[truncated: 754 more rows]
